# Supplementary material for: Increases in plasma corin levels following experimental myocardial infarction reflect the severity of ischemic injury
Source: PubMed Central journal article supplement (PMC6128455; doi:10.1371/journal.pone.0202571), 2018-09-07
Supplement: pone.0202571.s001.pdf [file pone.0202571.s001.pdf]

# **PLOSONE REVISION**

Raw data for each figure

Fig 1.

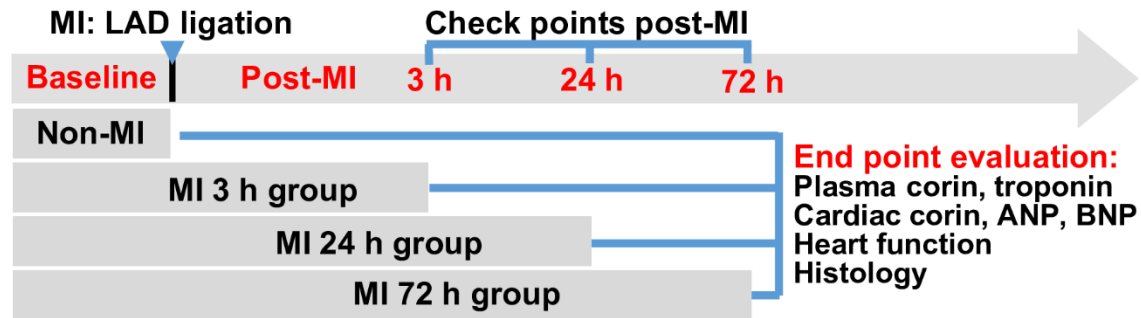

Fig 1. A schematic diagram showing the detailed animal groups involved in this study.

Figure 2

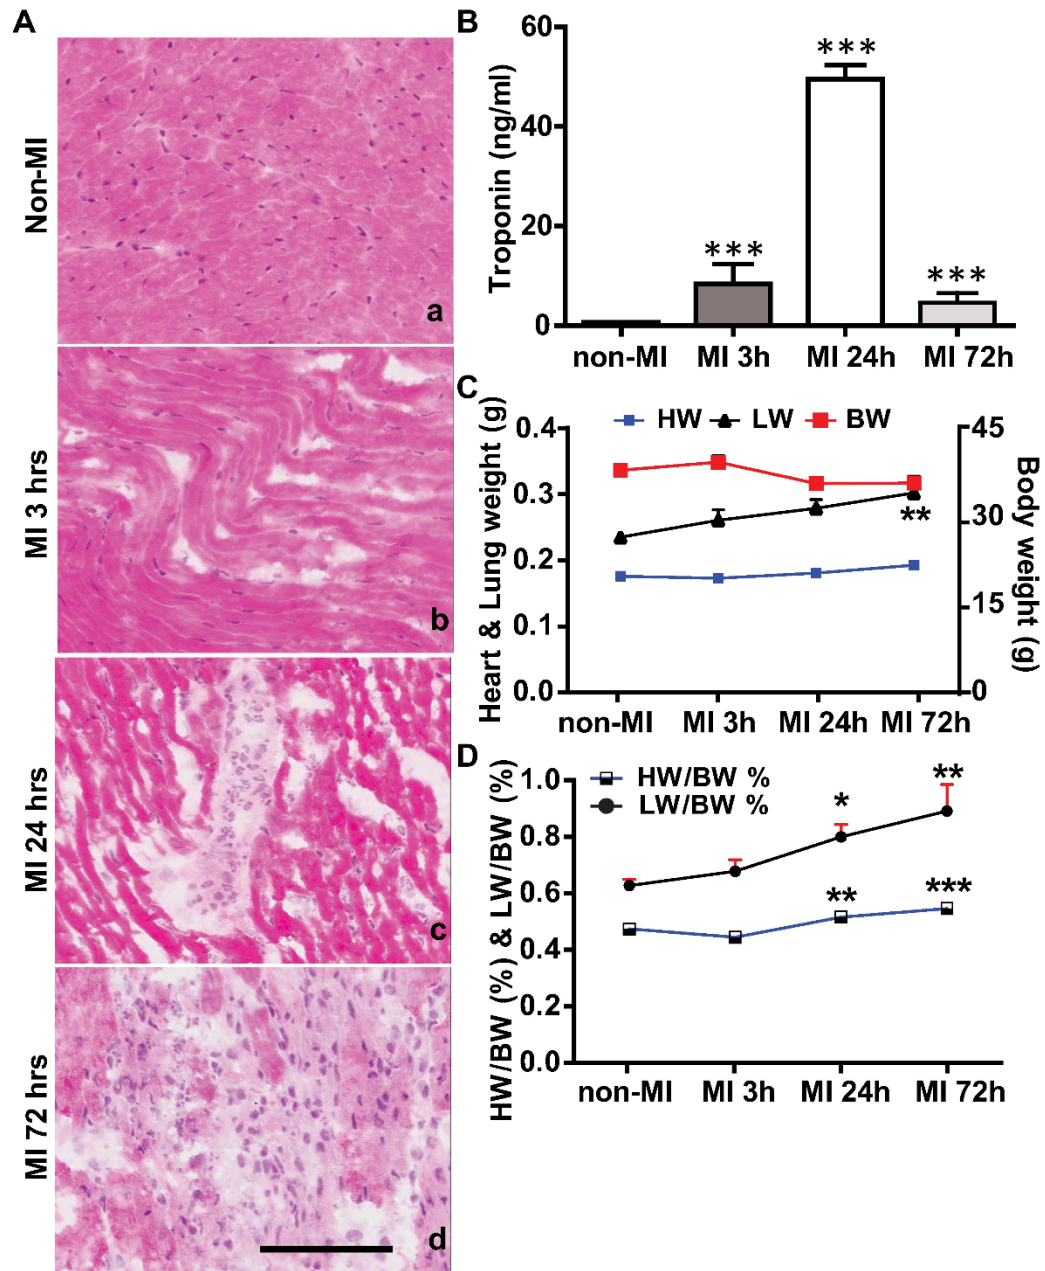

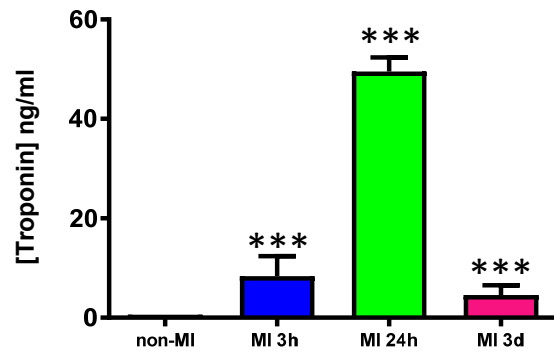

|                    | non-MI  | MI 3h | MI 24h | MI 3d  |
|--------------------|---------|-------|--------|--------|
| Number of values   | 10      | 7     | 8      | 6      |
| Minimum            | 0.5915  | 2.579 | 34.06  | 0.9123 |
| 25% Percentile     | 0.597   | 3.09  | 44.62  | 1.274  |
| Median             | 0.6121  | 3.633 | 51.91  | 2.956  |
| 75% Percentile     | 0.6306  | 7.622 | 56.05  | 7.531  |
| Maximum            | 0.6432  | 32.06 | 56.08  | 13.78  |
| Mean               | 0.6139  | 8.388 | 49.53  | 4.574  |
| Std. Deviation     | 0.01771 | 10.61 | 7.977  | 4.785  |
| Std. Error of Mean | 0.0056  | 4.008 | 2.82   | 1.953  |

| non-MI    | MI 3h    | MI 24h   | MI 3d    |
|-----------|----------|----------|----------|
| 0.6196783 | 3.344563 | 55.95416 | 1.394241 |
| 0.5976962 | 2.579305 | 56.08469 | 3.329012 |
| 0.6103632 | 3.632996 | 48.2582  | 13.77596 |
| 0.6291355 | 3.08981  | 44.11737 | 5.449426 |
| 0.5949172 | 7.622141 | 34.06269 | 2.582312 |
| 0.6032932 | 6.385074 | 55.56437 | 0.912339 |
| 0.6432179 | 32.06028 | 56.08469 |          |
| 0.6139293 |          | 46.11449 |          |
| 0.5914616 |          |          |          |
| 0.635027  |          |          |          |

|                      |        |        |       |         |
|----------------------|--------|--------|-------|---------|
| Lower 95% CI of mean | 0.6012 | -1.421 | 42.86 | -0.4476 |
| Upper 95% CI of mean | 0.6265 | 18.2   | 56.2  | 9.595   |
| Sum                  | 6.139  | 58.71  | 396.2 | 27.44   |

Bonferroni's multiple comparisons test

| test              | Mean Diff. | 95.00% CI of diff. | Significant? | Summary | Adjusted P Value | A-?      |
|-------------------|------------|--------------------|--------------|---------|------------------|----------|
| non-MI vs. MI 3h  | -0.952     | -1.276 to -0.6279  | Yes          | ****    | <0.0001          | B MI 3h  |
| non-MI vs. MI 24h | -1.901     | -2.213 to -1.589   | Yes          | ****    | <0.0001          | C MI 24h |
| non-MI vs. MI 3d  | -0.6978    | -1.037 to -0.3582  | Yes          | ****    | <0.0001          | D MI 3d  |

### body weight non-mi vs mi

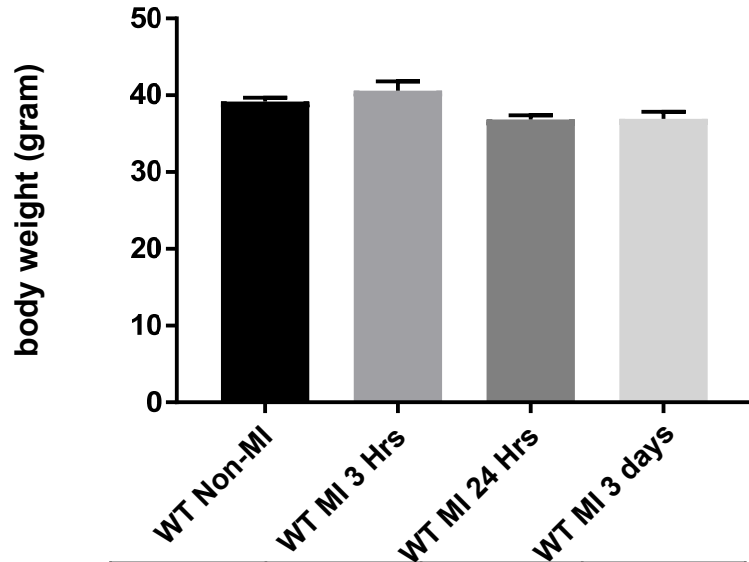

| WT Non-MI | WT MI 3 Hrs | WT MI 24 Hrs | WT MI 3 days |
|-----------|-------------|--------------|--------------|
| 38.04     | 45.93       | 35.75        | 35.22        |
| 39.15     | 42.06       | 34.74        | 36.84        |
| 38.7      | 42.5        | 39.45        | 42.3         |
| 37.17     | 39.25       | 35.84        | 36.86        |
| 39.58     | 40.58       | 37.97        | 37.93        |
| 37.24     | 36.63       | 36.5         | 34.67        |
| 41.09     | 37.3        | 37.36        | 34.41        |
| 42.48     |             | 37.22        | 37.34        |
| 38.88     |             |              |              |
| 39.46     |             |              |              |

|                      | WT Non-MI | WT MI 3 Hrs | WT MI 24 Hrs | WT MI 3 days |
|----------------------|-----------|-------------|--------------|--------------|
| Number of values     | 10        | 7           | 8            | 8            |
| Minimum              | 37.17     | 36.63       | 34.74        | 34.41        |
| 25% Percentile       | 37.84     | 37.3        | 35.77        | 34.81        |
| Median               | 39.02     | 40.58       | 36.86        | 36.85        |
| 75% Percentile       | 39.96     | 42.5        | 37.82        | 37.78        |
| Maximum              | 42.48     | 45.93       | 39.45        | 42.3         |
| Mean                 | 39.18     | 40.61       | 36.85        | 36.95        |
| Std. Deviation       | 1.64      | 3.231       | 1.474        | 2.518        |
| Std. Error of Mean   | 0.5186    | 1.221       | 0.5213       | 0.8904       |
| Lower 95% CI of mean | 38.01     | 37.62       | 35.62        | 34.84        |
| Upper 95% CI of mean | 40.35     | 43.6        | 38.09        | 39.05        |
| Sum                  | 391.8     | 284.3       | 294.8        | 295.6        |

#### Bonferroni's multiple comparisons test

|                               | Mean Diff. | 95.00% CI of diff. | Significant? | Summary | Adjusted P Value |     |
|-------------------------------|------------|--------------------|--------------|---------|------------------|-----|
| WT Non-MI vs. WT MI 3 Hrs     | -1.428     | -4.564 to 1.708    | No           | ns      | >0.9999          | A-B |
| WT Non-MI vs. WT MI 24 Hrs    | 2.325      | -0.6929 to 5.343   | No           | ns      | 0.2244           | A-C |
| WT Non-MI vs. WT MI 3 days    | 2.233      | -0.7854 to 5.251   | No           | ns      | 0.2703           | A-D |
| WT MI 3 Hrs vs. WT MI 24 Hrs  | 3.753      | 0.4603 to 7.046    | Yes          | *       | 0.0186           | B-C |
| WT MI 3 Hrs vs. WT MI 3 days  | 3.661      | 0.3678 to 6.954    | Yes          | *       | 0.0227           | B-D |
| WT MI 24 Hrs vs. WT MI 3 days | -0.0925    | -3.274 to 3.089    | No           | ns      | >0.9999          | C-D |

### heart weight non-mi vs mi

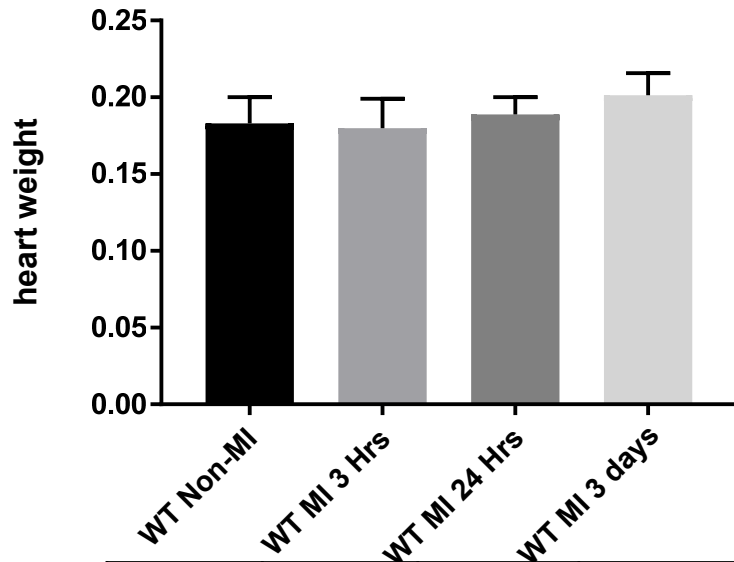

|                      | WT Non-MI | WT MI 3 Hrs | WT MI 24 Hrs | WT MI 3 days |
|----------------------|-----------|-------------|--------------|--------------|
| Number of values     | 10        | 7           | 8            | 8            |
| Minimum              | 0.16      | 0.15        | 0.17         | 0.18         |
| 25% Percentile       | 0.1675    | 0.17        | 0.1825       | 0.19         |
| Median               | 0.18      | 0.18        | 0.19         | 0.2          |
| 75% Percentile       | 0.2       | 0.19        | 0.19         | 0.2175       |
| Maximum              | 0.21      | 0.21        | 0.21         | 0.22         |
| Mean                 | 0.183     | 0.18        | 0.1888       | 0.2013       |
| Std. Deviation       | 0.01703   | 0.01915     | 0.01126      | 0.01458      |
| Std. Error of Mean   | 0.005385  | 0.007237    | 0.003981     | 0.005154     |
| Lower 95% CI of mean | 0.1708    | 0.1623      | 0.1793       | 0.1891       |
| Upper 95% CI of mean | 0.1952    | 0.1977      | 0.1982       | 0.2134       |
| Sum                  | 1.83      | 1.26        | 1.51         | 1.61         |

| WT Non-MI | WT MI 3 Hrs | WT MI 24 Hrs | WT MI 3 days |
|-----------|-------------|--------------|--------------|
| 0.18      | 0.21        | 0.19         | 0.21         |
| 0.18      | 0.19        | 0.19         | 0.19         |
| 0.17      | 0.19        | 0.19         | 0.18         |
| 0.16      | 0.18        | 0.19         | 0.2          |
| 0.19      | 0.17        | 0.21         | 0.22         |
| 0.16      | 0.15        | 0.19         | 0.19         |
| 0.21      | 0.17        | 0.17         | 0.2          |
| 0.2       |             | 0.18         | 0.22         |
| 0.2       |             |              |              |
| 0.18      |             |              |              |

Bonferroni's multiple comparisons test

|                               | Mean Diff. | 95.00% CI of diff.   | Significant? | Summary | Adjusted P Value |     |
|-------------------------------|------------|----------------------|--------------|---------|------------------|-----|
| WT Non-MI vs. WT MI 3 Hrs     | 0.003      | -0.01896 to 0.02496  | No           | ns      | >0.9999          | A-B |
| WT Non-MI vs. WT MI 24 Hrs    | -0.00575   | -0.02689 to 0.01539  | No           | ns      | >0.9999          | A-C |
| WT Non-MI vs. WT MI 3 days    | -0.01825   | -0.03939 to 0.002891 | No           | ns      | 0.1250           | A-D |
| WT MI 3 Hrs vs. WT MI 24 Hrs  | -0.00875   | -0.03182 to 0.01432  | No           | ns      | >0.9999          | B-C |
| WT MI 3 Hrs vs. WT MI 3 days  | -0.02125   | -0.04432 to 0.001817 | No           | ns      | 0.0854           | B-D |
| WT MI 24 Hrs vs. WT MI 3 days | -0.0125    | -0.03478 to 0.009785 | No           | ns      | 0.7384           | C-D |

### lung weight non-mi vs mi

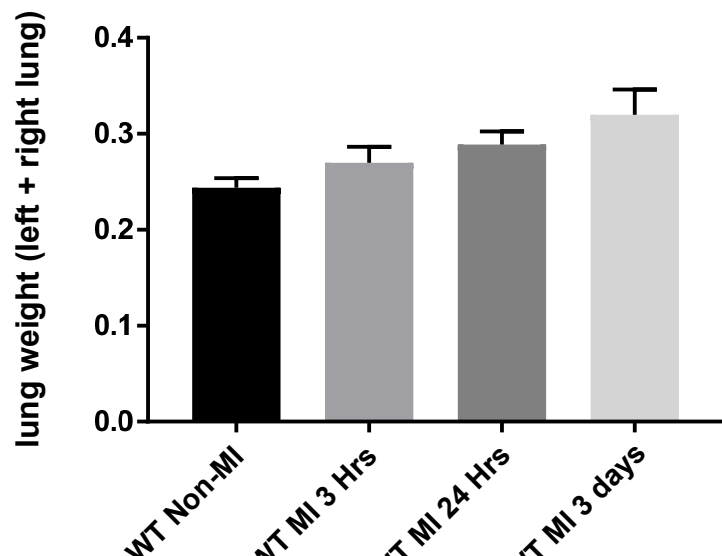

|                      | WT Non-MI | WT MI 3 Hrs | WT MI 24 Hrs | WT MI 3 days |
|----------------------|-----------|-------------|--------------|--------------|
| Number of values     | 10        | 7           | 8            | 8            |
| Minimum              | 0.2       | 0.211       | 0.24         | 0.24         |
| 25% Percentile       | 0.225     | 0.236       | 0.25         | 0.27         |
| Median               | 0.245     | 0.276       | 0.29         | 0.285        |
| 75% Percentile       | 0.26      | 0.278       | 0.3275       | 0.385        |
| Maximum              | 0.31      | 0.351       | 0.34         | 0.45         |
| Mean                 | 0.244     | 0.2699      | 0.2888       | 0.32         |
| Std. Deviation       | 0.03062   | 0.04368     | 0.03907      | 0.07426      |
| Std. Error of Mean   | 0.009684  | 0.01651     | 0.01381      | 0.02625      |
| Lower 95% CI of mean | 0.2221    | 0.2295      | 0.2561       | 0.2579       |
| Upper 95% CI of mean | 0.2659    | 0.3103      | 0.3214       | 0.3821       |
| Sum                  | 2.44      | 1.889       | 2.31         | 2.56         |

| WT Non-MI | WT MI 3 Hrs | WT MI 24 Hrs | WT MI 3 days |
|-----------|-------------|--------------|--------------|
| 0.23      | 0.277       | 0.33         | 0.27         |
| 0.23      | 0.278       | 0.29         | 0.24         |
| 0.25      | 0.26        | 0.25         | 0.37         |
| 0.21      | 0.351       | 0.34         | 0.45         |
| 0.24      | 0.276       | 0.25         | 0.3          |
| 0.2       | 0.236       | 0.32         | 0.27         |
| 0.25      | 0.211       | 0.29         | 0.39         |
| 0.26      |             | 0.24         | 0.27         |
| 0.31      |             |              |              |
| 0.26      |             |              |              |

| Bonferroni's multiple comparisons test | Mean Diff. | 95.00% CI of diff.  | Significant? | Summary     | Adjusted P Value | A-? |              |    |
|----------------------------------------|------------|---------------------|--------------|-------------|------------------|-----|--------------|----|
| WT Non-MI vs. WT MI 3 Hrs              | -0.02586   | -0.08701 to 0.0353  | No           | ns          | 0.8746           | B   | WT MI 3 Hrs  |    |
| WT Non-MI vs. WT MI 24 Hrs             | -0.04475   | -0.1036 to 0.01411  | No           | ns          | 0.1897           | C   | WT MI 24 Hrs |    |
| WT Non-MI vs. WT MI 3 days             | -0.076     | -0.1349 to -0.01714 | Yes          | **          | 0.0081           | D   | WT MI 3 days |    |
| Test details                           | Mean 1     | Mean 2              | Mean Diff.   | SE of diff. | n1               | n2  | t            | DF |
| WT Non-MI vs. WT MI 3 Hrs              | 0.244      | 0.2699              | -0.02586     | 0.02407     | 10               | 7   | 1.074        | 29 |
| WT Non-MI vs. WT MI 24 Hrs             | 0.244      | 0.2888              | -0.04475     | 0.02317     | 10               | 8   | 1.932        | 29 |
| WT Non-MI vs. WT MI 3 days             | 0.244      | 0.32                | -0.076       | 0.02317     | 10               | 8   | 3.281        | 29 |

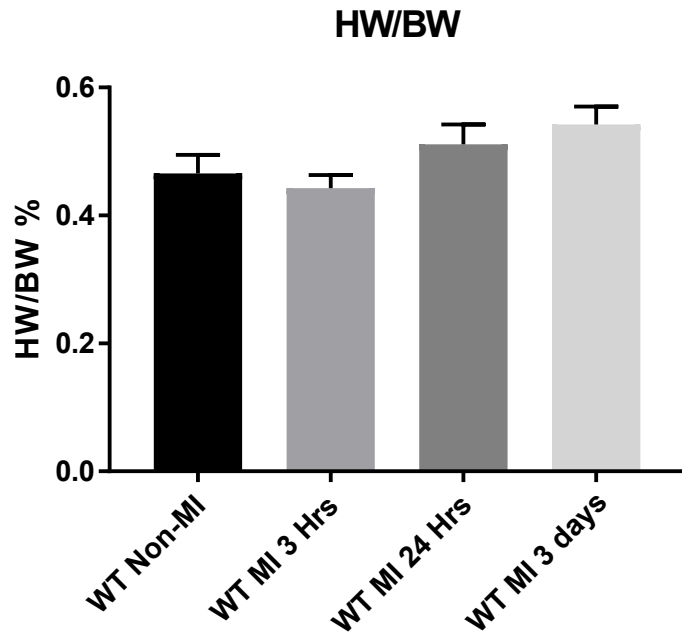

| WT Non-MI | WT MI 3 Hrs | WT MI 24 Hrs | WT MI 3 days |
|-----------|-------------|--------------|--------------|
| 0.47      | 0.46        | 0.52         | 0.55         |
| 0.46      | 0.45        | 0.55         | 0.52         |
| 0.44      | 0.44        | 0.49         | 0.57         |
| 0.43      | 0.46        | 0.52         | 0.57         |
| 0.48      | 0.41        | 0.55         | 0.56         |
| 0.43      | 0.42        | 0.51         | 0.49         |
| 0.51      | 0.46        | 0.46         | 0.55         |
| 0.47      |             | 0.49         | 0.53         |
| 0.51      |             |              |              |
| 0.46      |             |              |              |

|                      | WT Non-MI | WT MI 3 Hrs | WT MI 24 Hrs | WT MI 3 days |
|----------------------|-----------|-------------|--------------|--------------|
| Number of values     | 10        | 7           | 8            | 8            |
| Minimum              | 0.43      | 0.41        | 0.46         | 0.49         |
| 25% Percentile       | 0.4375    | 0.42        | 0.49         | 0.5225       |
| Median               | 0.465     | 0.45        | 0.515        | 0.55         |
| 75% Percentile       | 0.4875    | 0.46        | 0.5425       | 0.5675       |
| Maximum              | 0.51      | 0.46        | 0.55         | 0.57         |
| Mean                 | 0.466     | 0.4429      | 0.5113       | 0.5425       |
| Std. Deviation       | 0.02875   | 0.02059     | 0.03091      | 0.02765      |
| Std. Error of Mean   | 0.009092  | 0.007781    | 0.01093      | 0.009774     |
| Lower 95% CI of mean | 0.4454    | 0.4238      | 0.4854       | 0.5194       |
| Upper 95% CI of mean | 0.4866    | 0.4619      | 0.5371       | 0.5656       |
| Sum                  | 4.66      | 3.1         | 4.09         | 4.34         |

| Bonferroni's multiple comparisons test | Mean Diff. | 95.00% CI of diff.   | Significant? | Summary | Adjusted P Value | A-?          |
|----------------------------------------|------------|----------------------|--------------|---------|------------------|--------------|
| WT Non-MI vs. WT MI 3 Hrs              | 0.02314    | -0.01136 to 0.05765  | No           | ns      | 0.2971           | WT MI 3 Hrs  |
| WT Non-MI vs. WT MI 24 Hrs             | -0.04525   | -0.07846 to -0.01204 | Yes          | **      | 0.0051           | WT MI 24 Hrs |
| WT Non-MI vs. WT MI 3 days             | -0.0765    | -0.1097 to -0.04329  | Yes          | ****    | <0.0001          | WT MI 3 days |



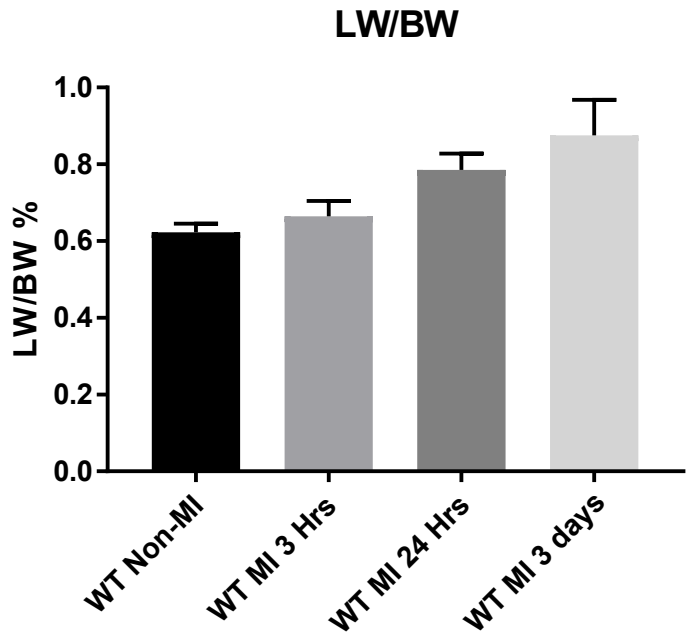

|                      | WT Non-MI | WT MI 3 Hrs | WT MI 24 Hrs | WT MI 3 days |
|----------------------|-----------|-------------|--------------|--------------|
| Number of values     | 10        | 7           | 8            | 8            |
| Minimum              | 0.54      | 0.57        | 0.64         | 0.64         |
| 25% Percentile       | 0.5825    | 0.6         | 0.66         | 0.67         |
| Median               | 0.61      | 0.64        | 0.8          | 0.725        |
| 75% Percentile       | 0.6525    | 0.68        | 0.905        | 1.16         |
| Maximum              | 0.8       | 0.89        | 0.94         | 1.29         |
| Mean                 | 0.623     | 0.6643      | 0.785        | 0.875        |
| Std. Deviation       | 0.07181   | 0.1063      | 0.1209       | 0.264        |
| Std. Error of Mean   | 0.02271   | 0.04017     | 0.04276      | 0.09333      |
| Lower 95% CI of mean | 0.5716    | 0.566       | 0.6839       | 0.6543       |
| Upper 95% CI of mean | 0.6744    | 0.7626      | 0.8861       | 1.096        |
| Sum                  | 6.23      | 4.65        | 6.28         | 7            |

| WT Non-MI | WT MI 3 Hrs | WT MI 24 Hrs | WT MI 3 days |
|-----------|-------------|--------------|--------------|
| 0.6       | 0.6         | 0.92         | 0.7          |
| 0.59      | 0.66        | 0.83         | 0.64         |
| 0.65      | 0.61        | 0.64         | 1.19         |
| 0.56      | 0.89        | 0.94         | 1.29         |
| 0.61      | 0.68        | 0.66         | 0.75         |
| 0.54      | 0.64        | 0.86         | 0.7          |
| 0.61      | 0.57        | 0.77         | 1.07         |
| 0.61      |             | 0.66         | 0.66         |
| 0.8       |             |              |              |
| 0.66      |             |              |              |

Dunnett's multiple comparisons test

| test                       | Mean Diff. | 95.00% CI of diff.  | Significant? | Summary | Adjusted P Value | A-?          |
|----------------------------|------------|---------------------|--------------|---------|------------------|--------------|
| WT Non-MI vs. WT MI 3 Hrs  | -0.02603   | -0.1235 to 0.07141  | No           | ns      | 0.8467           | WT MI 3 Hrs  |
| WT Non-MI vs. WT MI 24 Hrs | -0.09817   | -0.192 to -0.004385 | Yes          | *       | 0.0386           | WT MI 24 Hrs |
| WT Non-MI vs. WT MI 3 days | -0.1337    | -0.2275 to -0.03992 | Yes          | **      | 0.0039           | WT MI 3 days |

Figure 3

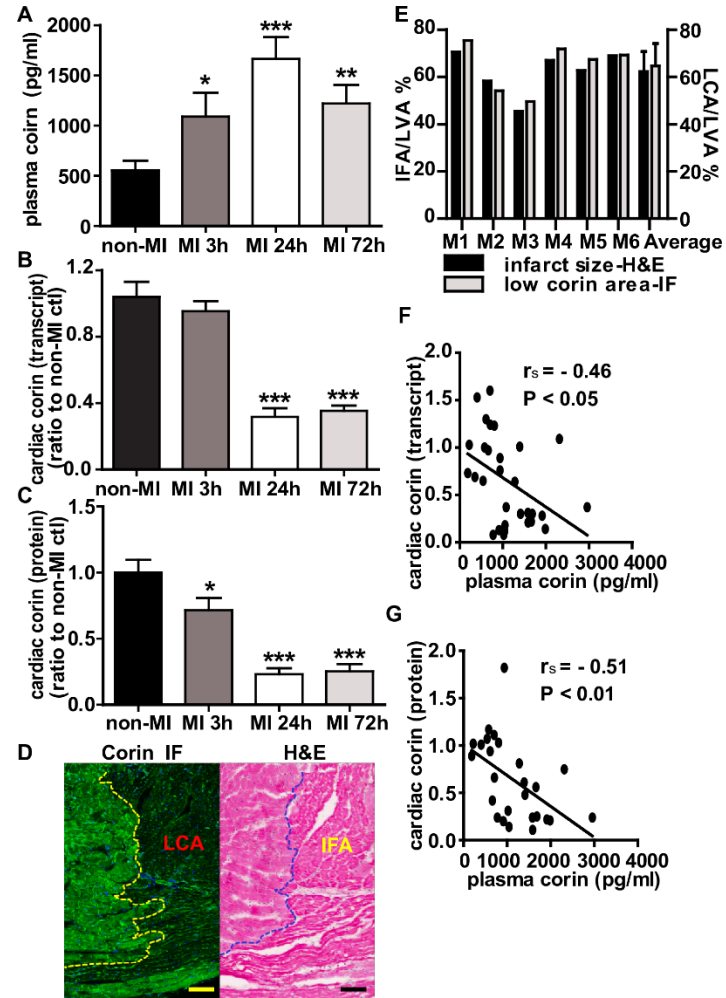

Figure 3.

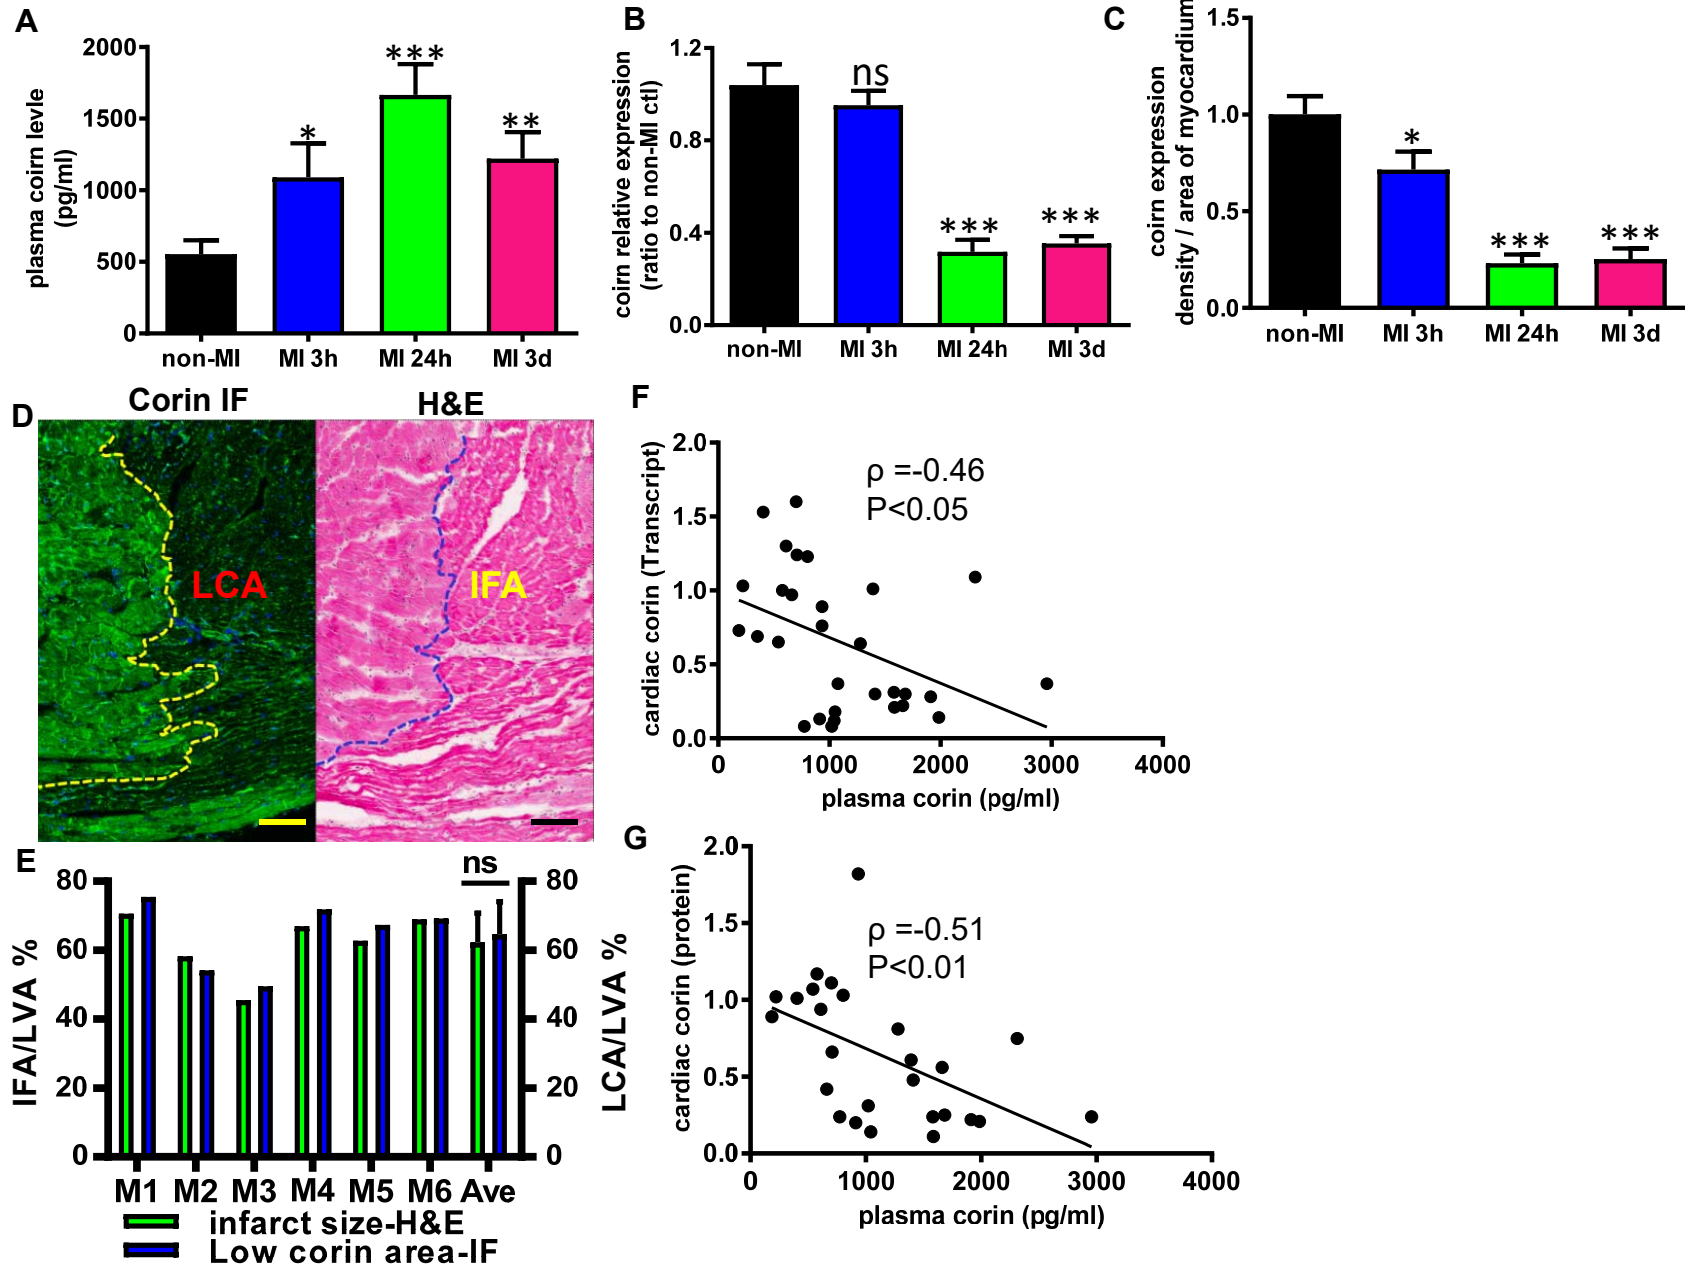

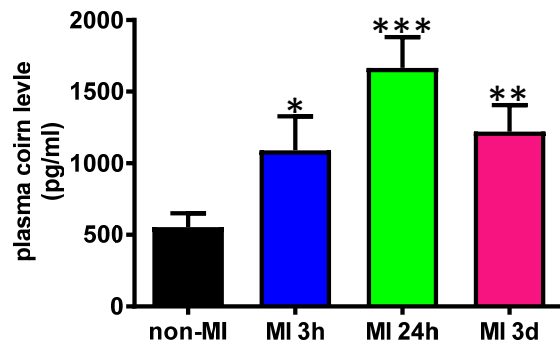

|                      | non-MI | MI 3h | MI 24h | MI 3d |
|----------------------|--------|-------|--------|-------|
| Number of values     | 9      | 7     | 8      | 6     |
| Minimum              | 186.3  | 576.0 | 1049   | 774.9 |
| 25% Percentile       | 286.3  | 661.7 | 1161   | 877.7 |
| Median               | 540.6  | 707.4 | 1583   | 1032  |
| 75% Percentile       | 869.1  | 1393  | 1911   | 1723  |
| Maximum              | 934.9  | 2313  | 2958   | 1912  |
| Mean                 | 553.9  | 1090  | 1666   | 1221  |
| Std. Deviation       | 288.4  | 628.3 | 606.8  | 455.4 |
| Std. Error           | 96.13  | 237.5 | 214.5  | 185.9 |
| Lower 95% CI of mean | 332.2  | 509.2 | 1159   | 742.7 |
| Upper 95% CI of mean | 775.6  | 1671  | 2174   | 1698  |
| Sum                  | 4985   | 7632  | 13330  | 7323  |

| non-MI | MI 3h   | MI 24h  | MI 3d   |
|--------|---------|---------|---------|
| 934.86 | 2313.14 | 2957.71 | 1912    |
| 803.43 | 1278.86 | 1409.14 | 1020.57 |
| 934.86 | 1393.14 | 1986.29 | 1660.57 |
| 540.57 | 576     | 1683.43 | 1043.43 |
| 220.57 | 661.71  | 1580.57 | 912     |
| 609.14 | 707.43  | 1586.29 | 774.86  |
| 403.43 | 701.71  | 1049.14 |         |
| 352    |         | 1077.71 |         |
| 186.29 |         |         |         |

Bonferroni's multiple comparisons test

| test              | Mean Diff. | 95.00% CI of diff.  | Significant? | Summary | Adjusted P Value | A-?      |
|-------------------|------------|---------------------|--------------|---------|------------------|----------|
| non-MI vs. MI 3h  | -0.3034    | -0.5689 to -0.03801 | Yes          | *       | 0.0211           | B MI 3h  |
| non-MI vs. MI 24h | -0.5185    | -0.7744 to -0.2625  | Yes          | ****    | <0.0001          | C MI 24h |
| non-MI vs. MI 3d  | -0.3819    | -0.6595 to -0.1043  | Yes          | **      | 0.0048           | D MI 3d  |

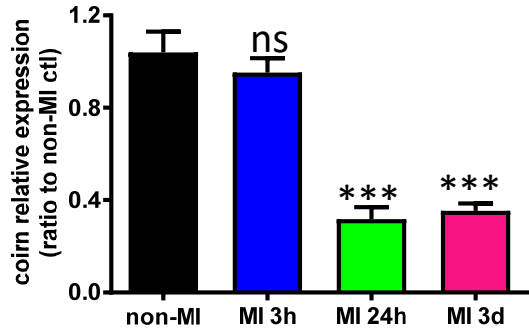

| non-MI | MI 3h | MI 24h | MI 3d |
|--------|-------|--------|-------|
| 0.97   | 1.08  | 0.36   | 0.44  |
| 1.49   | 0.97  | 0.61   | 0.23  |
| 0.95   | 0.95  | 0.08   | 0.49  |
| 0.61   | 1.02  | 0.31   | 0.39  |
| 1.11   | 0.62  | 0.34   | 0.41  |
| 1.29   | 0.92  | 0.29   | 0.28  |
| 1.28   | 1.11  | 0.32   | 0.29  |
| 1.21   |       | 0.23   | 0.3   |
| 0.68   |       |        |       |
| 0.8    |       |        |       |

|                      | non-MI  | MI 3h   | MI 24h  | MI 3d   |
|----------------------|---------|---------|---------|---------|
| Number of values     | 10      | 7       | 8       | 8       |
| Minimum              | 0.61    | 0.62    | 0.08    | 0.23    |
| 25% Percentile       | 0.77    | 0.92    | 0.245   | 0.2825  |
| Median               | 1.04    | 0.97    | 0.315   | 0.345   |
| 75% Percentile       | 1.283   | 1.08    | 0.355   | 0.4325  |
| Maximum              | 1.49    | 1.11    | 0.61    | 0.49    |
| Mean                 | 1.039   | 0.9529  | 0.3175  | 0.3538  |
| Std. Deviation       | 0.287   | 0.162   | 0.1477  | 0.09117 |
| Std. Error of Mean   | 0.09077 | 0.06125 | 0.05223 | 0.03223 |
| Lower 95% CI of mean | 0.8337  | 0.803   | 0.194   | 0.2775  |
| Upper 95% CI of mean | 1.244   | 1.103   | 0.441   | 0.43    |
| Sum                  | 10.39   | 6.67    | 2.54    | 2.83    |

Bonferroni's multiple comparisons test

|                   | Mean Diff. | 95.00% CI of diff. | Significant? | Summary | Adjusted P Value | A-?      |
|-------------------|------------|--------------------|--------------|---------|------------------|----------|
| non-MI vs. MI 3h  | 0.08614    | -0.1588 to 0.3311  | No           | ns      | >0.9999          | B MI 3h  |
| non-MI vs. MI 24h | 0.7215     | 0.4857 to 0.9573   | Yes          | ***     | <0.0001          | C MI 24h |
| non-MI vs. MI 3d  | 0.6853     | 0.4495 to 0.921    | Yes          | ***     | <0.0001          | D MI 3d  |

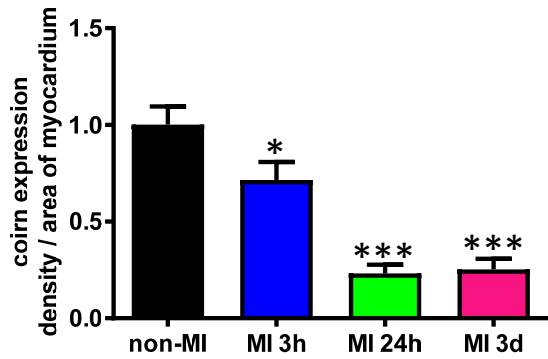

|                      | non-MI  | MI 3h  | MI 24h  | MI 3d   |
|----------------------|---------|--------|---------|---------|
| Number of values     | 8       | 7      | 6       | 6       |
| Minimum              | 0.81    | 0.38   | 0.1     | 0.13    |
| 25% Percentile       | 0.875   | 0.55   | 0.1675  | 0.1675  |
| Median               | 0.93    | 0.68   | 0.22    | 0.21    |
| 75% Percentile       | 0.9625  | 1.01   | 0.275   | 0.3375  |
| Maximum              | 1.65    | 1.06   | 0.44    | 0.51    |
| Mean                 | 1.001   | 0.7157 | 0.2317  | 0.2533  |
| Std. Deviation       | 0.267   | 0.245  | 0.1121  | 0.135   |
| Std. Error of Mean   | 0.09439 | 0.0926 | 0.04578 | 0.05512 |
| Lower 95% CI of mean | 0.7781  | 0.4891 | 0.114   | 0.1117  |
| Upper 95% CI of mean | 1.224   | 0.9423 | 0.3494  | 0.395   |
| Sum                  | 8.01    | 5.01   | 1.39    | 1.52    |

| non-MI | MI 3h | MI 24h | MI 3d |
|--------|-------|--------|-------|
| 1.65   | 0.68  | 0.22   | 0.2   |
| 0.94   | 0.73  | 0.44   | 0.28  |
| 0.97   | 0.55  | 0.19   | 0.51  |
| 0.93   | 1.06  | 0.22   | 0.13  |
| 0.86   | 0.38  | 0.22   | 0.18  |
| 0.92   | 0.6   | 0.1    | 0.22  |
| 0.93   | 1.01  |        |       |
| 0.81   |       |        |       |

Bonferroni's multiple comparisons test

| test              | Mean Diff. | 95.00% CI of diff. | Significant? | Summary | Adjusted P Value | A-?      |
|-------------------|------------|--------------------|--------------|---------|------------------|----------|
| non-MI vs. MI 3h  | 0.2855     | 0.005078 to 0.566  | Yes          | *       | 0.0450           | B MI 3h  |
| non-MI vs. MI 24h | 0.7696     | 0.4769 to 1.062    | Yes          | ****    | <0.0001          | C MI 24h |
| non-MI vs. MI 3d  | 0.7479     | 0.4553 to 1.041    | Yes          | ****    | <0.0001          | D MI 3d  |

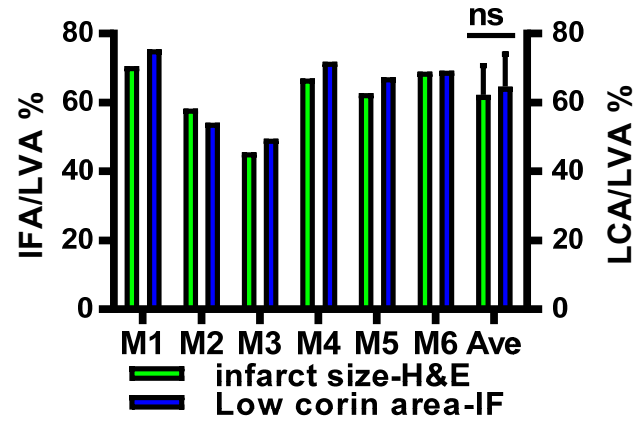

|    | infarct size-H&E | Low corin area-IF |
|----|------------------|-------------------|
| M1 | 70.6             | 75.5              |
| M2 | 58.2             | 54.1              |
| M3 | 45.5             | 49.5              |
| M4 | 67               | 71.9              |
| M5 | 62.7             | 67.4              |
| M6 | 69               | 69.2              |

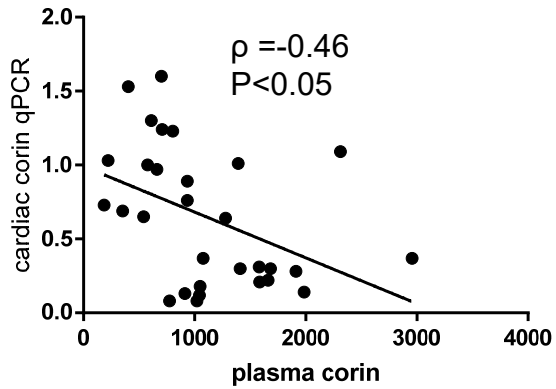

| plasma corin | cardiac corin qPCR |
|--------------|--------------------|
| 934.86       | 0.76               |
| 803.43       | 1.23               |
| 934.86       | 0.89               |
| 540.57       | 0.65               |
| 220.57       | 1.03               |
| 609.14       | 1.3                |
| 403.43       | 1.53               |
| 352          | 0.69               |
| 186.29       | 0.73               |
| 2313.14      | 1.09               |
| 1278.86      | 0.64               |
| 1393.14      | 1.01               |
| 576          | 1                  |
| 661.71       | 0.97               |
| 707.43       | 1.24               |
| 701.71       | 1.6                |
| 2957.71      | 0.37               |
| 1409.14      | 0.3                |
| 1986.29      | 0.14               |
| 1683.43      | 0.3                |
| 1580.57      | 0.31               |
| 1586.29      | 0.21               |
| 1049.14      | 0.18               |
| 1077.71      | 0.37               |
| 1912         | 0.28               |
| 1020.57      | 0.08               |
| 1660.57      | 0.22               |
| 1043.43      | 0.12               |
| 912          | 0.13               |
| 774.86       | 0.08               |

| Parameter                     | plasma corin vs. cardiac corin qPCR |
|-------------------------------|-------------------------------------|
| <b>Spearman r</b>             |                                     |
| r                             | -0.458                              |
| 95% confidence interval       | -0.708 to -0.1061                   |
| P value                       |                                     |
| P (two-tailed)                | 0.0109                              |
| P value summary               | *                                   |
| Exact or approximate P value? | Approximate                         |
| Significant? (alpha = 0.05)   | Yes                                 |
| Number of XY Pairs            | 30                                  |



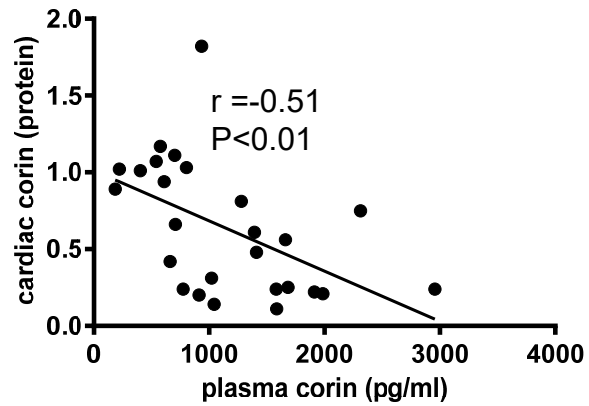

| plasma corin | cardiac corin if |
|--------------|------------------|
| 934.86       | 1.82             |
| 803.43       | 1.03             |
| 540.57       | 1.07             |
| 220.57       | 1.02             |
| 609.14       | 0.94             |
| 403.43       | 1.01             |
| 186.29       | 0.89             |
| 2313.14      | 0.75             |
| 1278.86      | 0.81             |
| 1393.14      | 0.61             |
| 576          | 1.17             |
| 661.71       | 0.42             |
| 707.43       | 0.66             |
| 701.71       | 1.11             |
| 2957.71      | 0.24             |
| 1409.14      | 0.48             |
| 1986.29      | 0.21             |
| 1683.43      | 0.25             |
| 1580.57      | 0.24             |
| 1586.29      | 0.11             |
| 1912         | 0.22             |
| 1020.57      | 0.31             |
| 1660.57      | 0.56             |
| 1043.43      | 0.14             |
| 912          | 0.2              |
| 774.86       | 0.24             |

| Parameter                     | plasma corin<br>vs.<br>cardiac corin if |
|-------------------------------|-----------------------------------------|
| <b>Spearman r</b>             |                                         |
| r                             | -0.6052                                 |
| 95% confidence interval       | -0.8083 to -0.2734                      |
| P value                       |                                         |
| P (two-tailed)                | 0.0011                                  |
| P value summary               | **                                      |
| Exact or approximate P value? | Approximate                             |
| Significant? (alpha = 0.05)   | Yes                                     |
| Number of XY Pairs            | 26                                      |

Figure 4

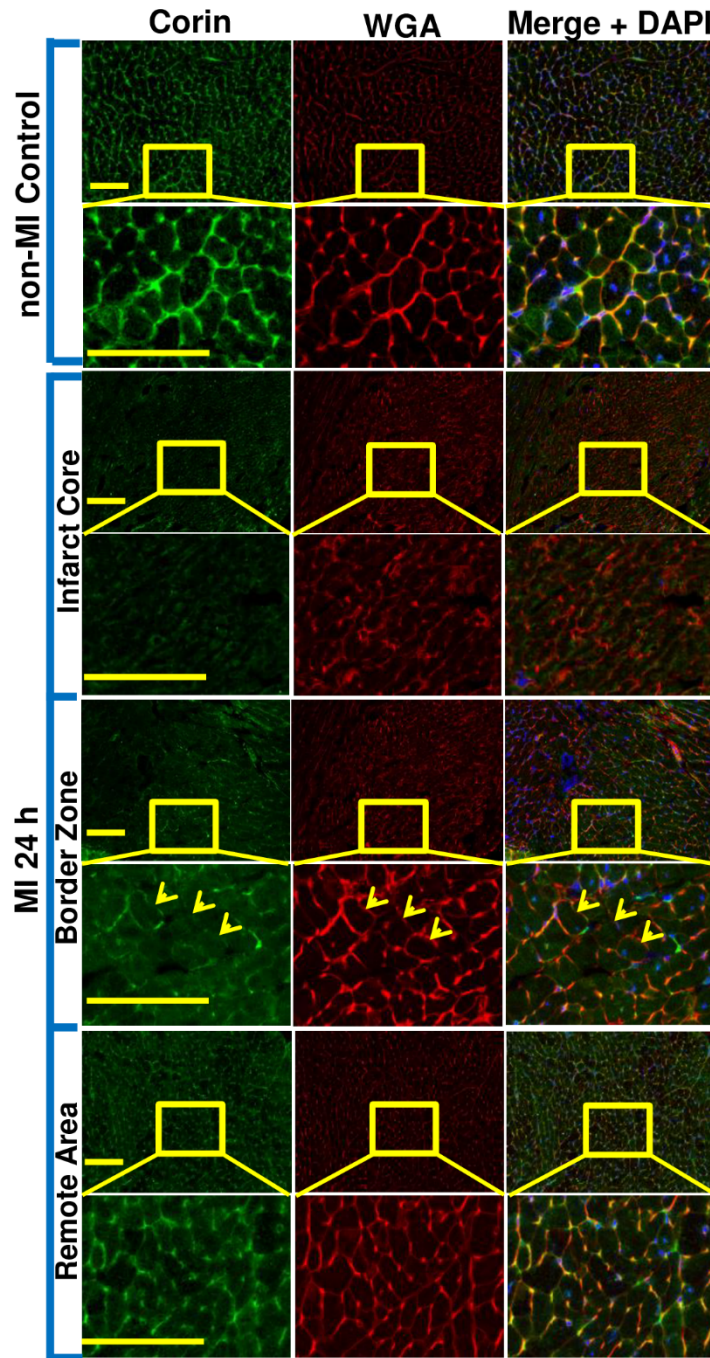

Fig 4.

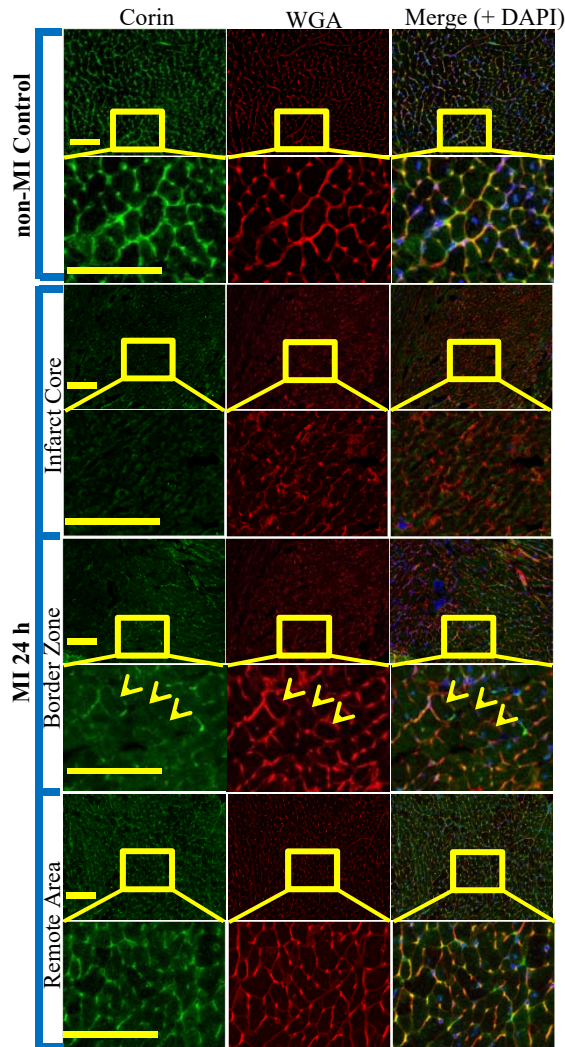

Fig 4. Spatial character of corin reduction in different regions of injured myocardium 24 hours post-MI. Corin protein expression in non-MI and MI hearts assessed by double immunofluorescence (IF) staining on heart coronary sections with corin antibody followed by labelling with anti-rabbit AlexaFluor® 488 (green), WGA-Rhodamine (red) and counterstaining with DAPI (blue). Representative image of normal myocardium in left ventricle from non-MI hearts (row 1 & 2 panels) and infarct core region (row 3 & 4 panels) and border zone (row 5 & 6 panels) as well as remote area (row 7 & 8 panels) in MI hearts at low and high magnification (top vs bottom panels, bar=100  $\mu$ m) . When compared to non-MI heart, corin expression in infarct core and border zone was significantly decreased while was relatively preserved in remote area. In addition, the integrity of cell membrane in infarct core was completely lost suggesting necrotic death. Border zone was transition area in which the cardiomyocytes with or without integrity of cell membrane were co-exist. Yellow arrows indicate three individual myocytes which show reduced corin expression (green channel) though the integrity of the cell membrane were well preserved (red channel). n = 4 mice per group.

Figure 5

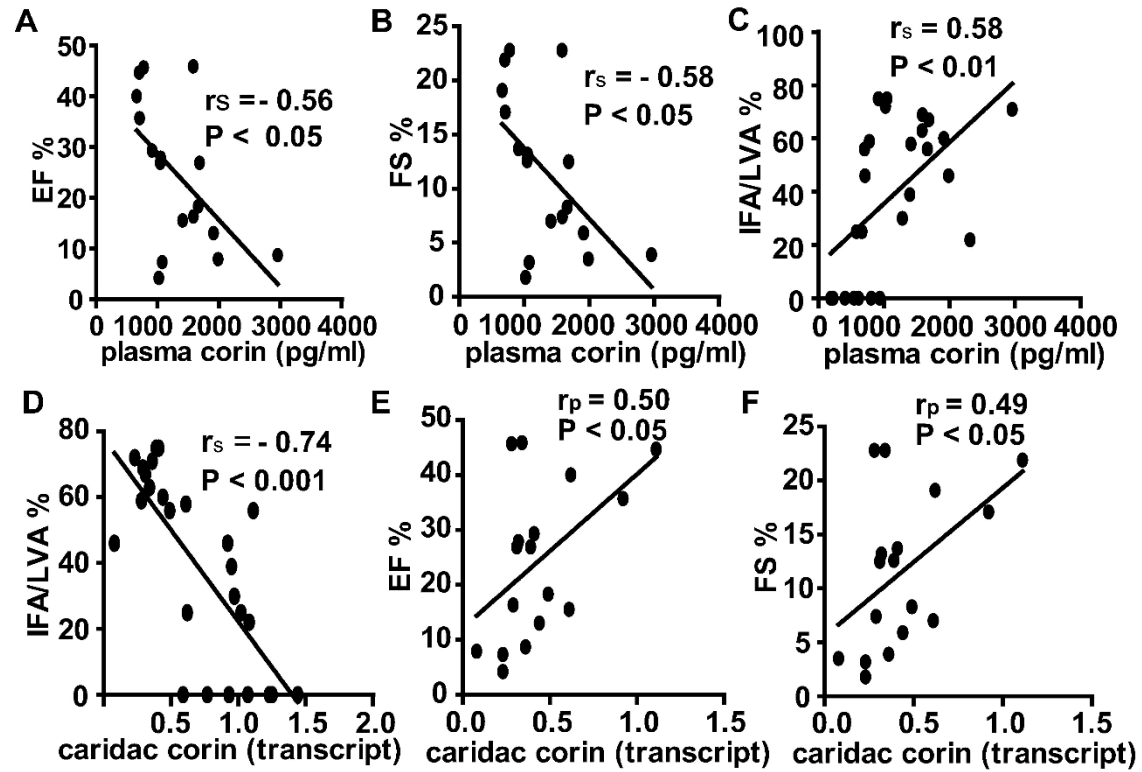

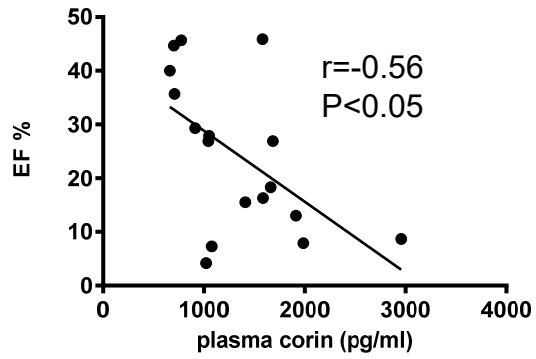

### Transform of plasma corin vs EF % correlation

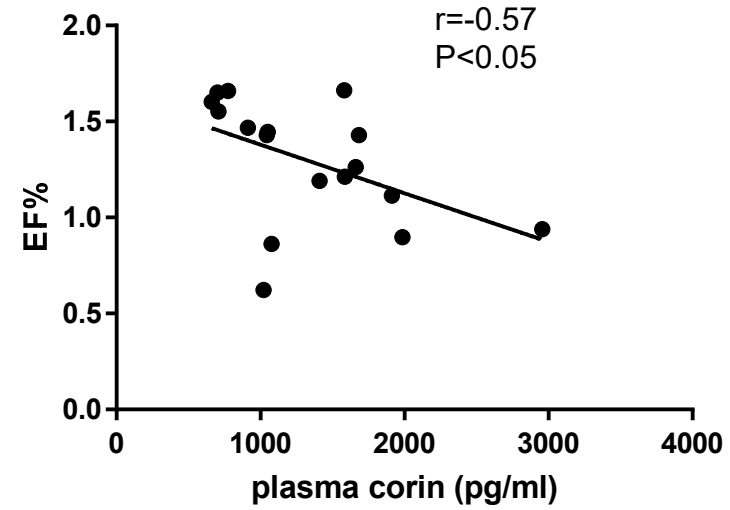

|                               | plasma corin<br>(pg/ml)<br>vs.<br>EF% |
|-------------------------------|---------------------------------------|
| <b>Spearman r</b>             |                                       |
| r                             | -0.5702                               |
| 95% confidence interval       | -0.8297 to -0.1081                    |
| P value                       |                                       |
| P (two-tailed)                | 0.0185                                |
| P value summary               | *                                     |
| Exact or approximate P value? | Exact                                 |
| Significant? (alpha = 0.05)   | Yes                                   |
| Number of XY Pairs            | 17                                    |

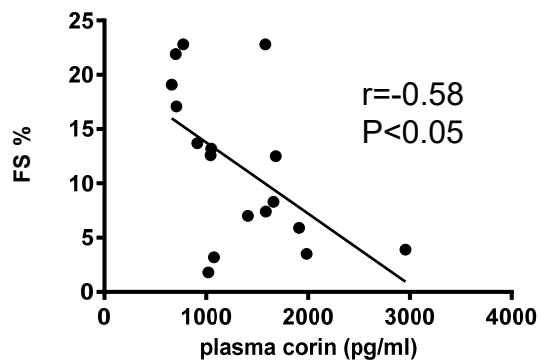

|                               | plasma corin<br>(pg/ml)<br>vs.<br>FS % |
|-------------------------------|----------------------------------------|
| Spearman r                    |                                        |
| r                             | -0.5874                                |
| 95% confidence interval       | -0.8376 to -0.1335                     |
| P value                       |                                        |
| P (two-tailed)                | 0.0148                                 |
| P value summary               | *                                      |
| Exact or approximate P value? | Exact                                  |
| Significant? (alpha = 0.05)   | Yes                                    |
| Number of XY Pairs            | 17                                     |

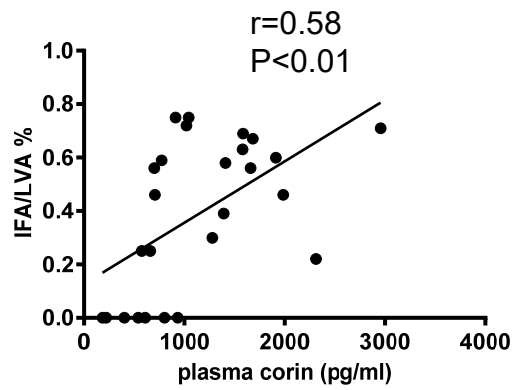

|                               | plasma corin<br>vs.<br>infarct size |
|-------------------------------|-------------------------------------|
| Spearman r                    |                                     |
| r                             | 0.579                               |
| 95% confidence interval       | 0.2356 to 0.7938                    |
| P value                       |                                     |
| P (two-tailed)                | 0.0019                              |
| P value summary               | **                                  |
| Exact or approximate P value? | Approximate                         |
| Significant? (alpha = 0.05)   | Yes                                 |
| Number of XY Pairs            | 26                                  |

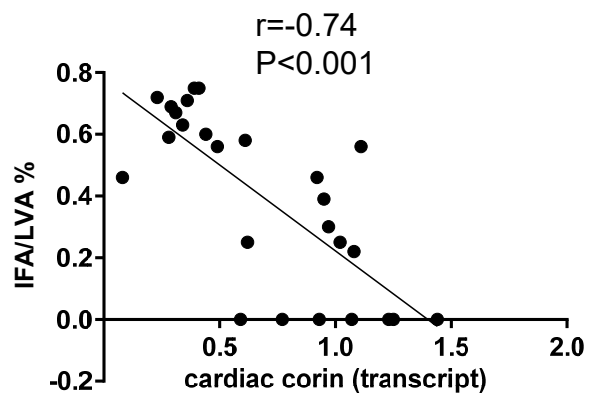

cardiac corin qPCR  
vs.  
infarct size

|                               |                    |
|-------------------------------|--------------------|
| Spearman r                    |                    |
| r                             | -0.7444            |
| 95% confidence interval       | -0.8812 to -0.4927 |
| P value                       |                    |
| P (two-tailed)                | <0.0001            |
| P value summary               | ****               |
| Exact or approximate P value? | Approximate        |
| Significant? (alpha = 0.05)   | Yes                |
| Number of XY Pairs            | 26                 |



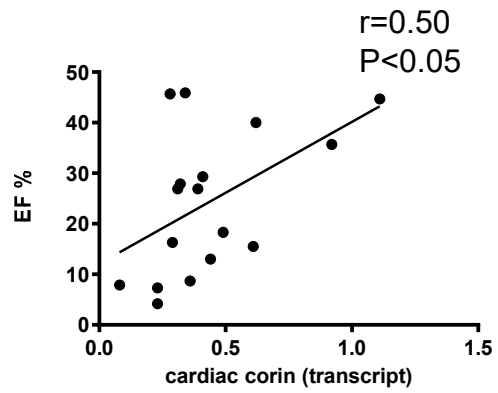

|                             | cardiac corin PCR<br>vs.<br>EF% |
|-----------------------------|---------------------------------|
| Pearson r                   | 0.5035                          |
| r                           | 0.5035                          |
| 95% confidence interval     | 0.03013 to 0.7924               |
| R squared                   | 0.2535                          |
| P value                     |                                 |
| P (two-tailed)              | 0.0394                          |
| P value summary             | *                               |
| Significant? (alpha = 0.05) | Yes                             |
| Number of XY Pairs          | 17                              |

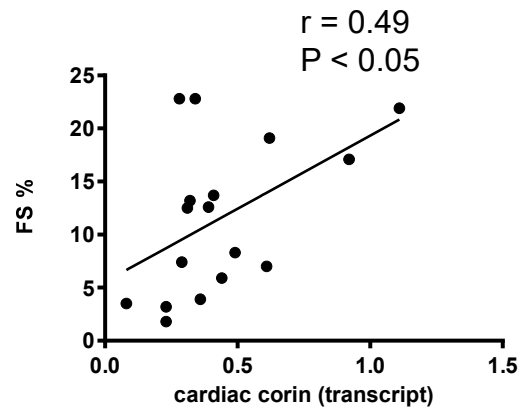

|                             | cardiac corin PCR<br>vs.<br>FS % |
|-----------------------------|----------------------------------|
| Pearson r                   |                                  |
| r                           | 0.4932                           |
| 95% confidence interval     | 0.01645 to 0.7872                |
| R squared                   | 0.2432                           |
| P value                     |                                  |
| P (two-tailed)              | 0.0443                           |
| P value summary             | *                                |
| Significant? (alpha = 0.05) | Yes                              |
| Number of XY Pairs          | 17                               |

Figure 6

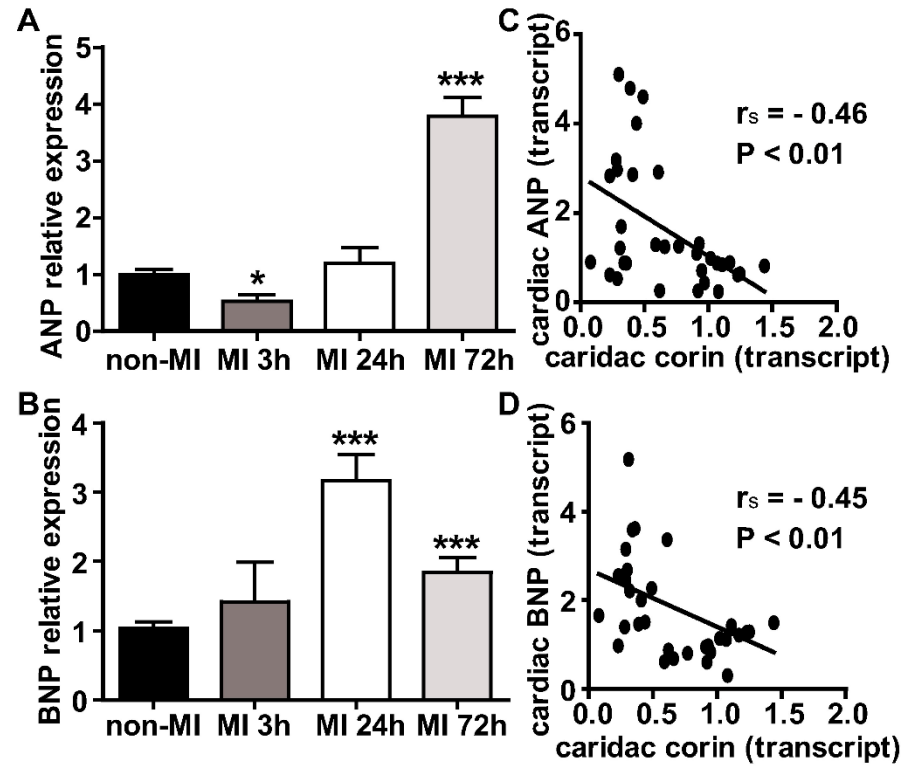

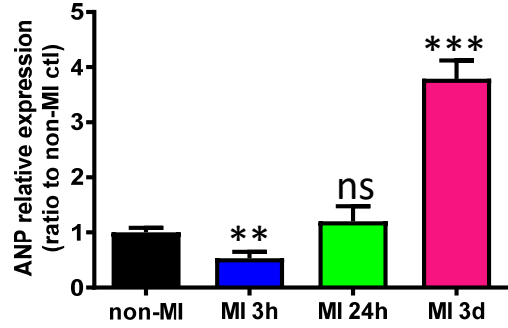

| non-MI | MI 3h | MI 24h | MI 3d |
|--------|-------|--------|-------|
| 1.31   | 0.24  | 0.87   | 4     |
| 0.81   | 0.43  | 2.91   | 2.83  |
| 1.09   | 0.71  | 0.9    | 4.6   |
| 1.29   | 0.98  | 1.21   | 4.79  |
| 0.87   | 0.26  | 0.88   | 2.86  |
| 0.64   | 0.25  | 0.53   | 3.18  |
| 0.61   | 0.84  | 1.69   | 2.96  |
| 0.89   |       | 0.61   | 5.1   |
| 1.24   |       |        |       |
| 1.25   |       |        |       |

Number of families 1

Number of comparisons per family 3

Alpha 0.05

Bonferroni's multiple comparisons test

|                   | Mean Diff. | 95.00% CI of diff. | Significant? | Summary | Adjusted P Value | A-?      |
|-------------------|------------|--------------------|--------------|---------|------------------|----------|
| non-MI vs. MI 3h  | 0.3283     | 0.09 to 0.5665     | Yes          | **      | 0.0046           | B MI 3h  |
| non-MI vs. MI 24h | -0.03085   | -0.2602 to 0.1985  | No           | ns      | >0.9999          | C MI 24h |
| non-MI vs. MI 3d  | -0.5824    | -0.8117 to -0.353  | Yes          | ****    | <0.0001          | D MI 3d  |

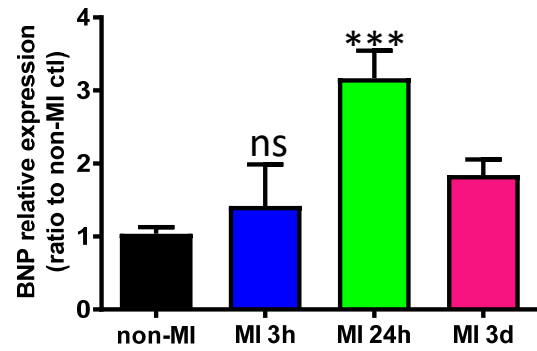

| non-MI | MI 3h | MI 24h | MI 3d |
|--------|-------|--------|-------|
| 0.97   | 0.3   | 3.62   | 1.51  |
| 1.49   | 4.74  | 3.37   | 0.97  |
| 0.95   | 0.83  | 1.66   | 2.27  |
| 0.61   | 1.14  | 5.18   | 1.46  |
| 1.11   | 0.88  | 3.59   | 2     |
| 1.29   | 0.6   | 3.15   | 1.4   |
| 1.28   | 1.43  | 2.21   | 2.45  |
| 1.21   |       | 2.56   | 2.68  |
| 0.68   |       |        |       |
| 0.8    |       |        |       |

Number of families 1

Number of comparisons per family 3

Alpha 0.05

Bonferroni's multiple comparisons test

| test              | Mean Diff. | 95.00% CI of diff. | Significant? | Summary | Adjusted P Value | A-?      |
|-------------------|------------|--------------------|--------------|---------|------------------|----------|
| non-MI vs. MI 3h  | -0.3781    | -1.539 to 0.7829   | No           | ns      | >0.9999          | B MI 3h  |
| non-MI vs. MI 24h | -2.129     | -3.246 to -1.011   | Yes          | ***     | 0.0001           | C MI 24h |
| non-MI vs. MI 3d  | -0.8035    | -1.921 to 0.3141   | No           | ns      | 0.2341           | D MI 3d  |

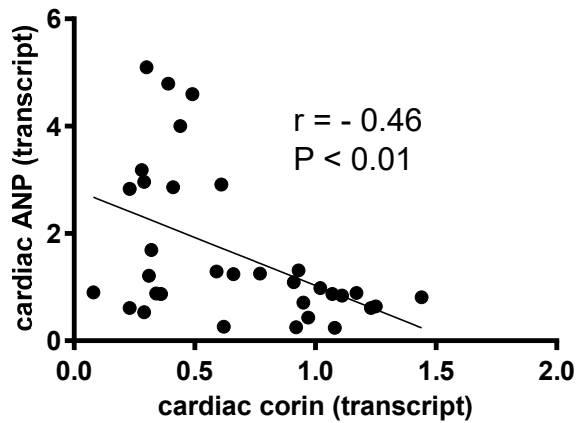

cardiac corin  
qPCR  
vs.  
cardiac anp qPCR

Spearman r

r -1

95% confidence interval -1 to -1

P value

P (two-tailed) <0.0001

P value summary \*\*\*\*

Exact or approximate P value? Approximate

Significant? (alpha = 0.05) Yes

Number of XY Pairs 101

| cardiac corin qPCR | cardiac anp qPCR |
|--------------------|------------------|
| 0.93               | 1.31             |
| 1.44               | 0.81             |
| 0.91               | 1.09             |
| 0.59               | 1.29             |
| 1.07               | 0.87             |
| 1.25               | 0.64             |
| 1.23               | 0.61             |
| 1.17               | 0.89             |
| 0.66               | 1.24             |
| 0.77               | 1.25             |
| 1.08               | 0.24             |
| 0.97               | 0.43             |
| 0.95               | 0.71             |
| 1.02               | 0.98             |
| 0.62               | 0.26             |
| 0.92               | 0.25             |
| 1.11               | 0.84             |
| 0.36               | 0.87             |
| 0.61               | 2.91             |
| 0.08               | 0.9              |
| 0.31               | 1.21             |
| 0.34               | 0.88             |
| 0.29               | 0.53             |
| 0.32               | 1.69             |
| 0.23               | 0.61             |
| 0.44               | 4                |
| 0.23               | 2.83             |
| 0.49               | 4.6              |
| 0.39               | 4.79             |
| 0.41               | 2.86             |
| 0.28               | 3.18             |
| 0.29               | 2.96             |
| 0.3                | 5.1              |

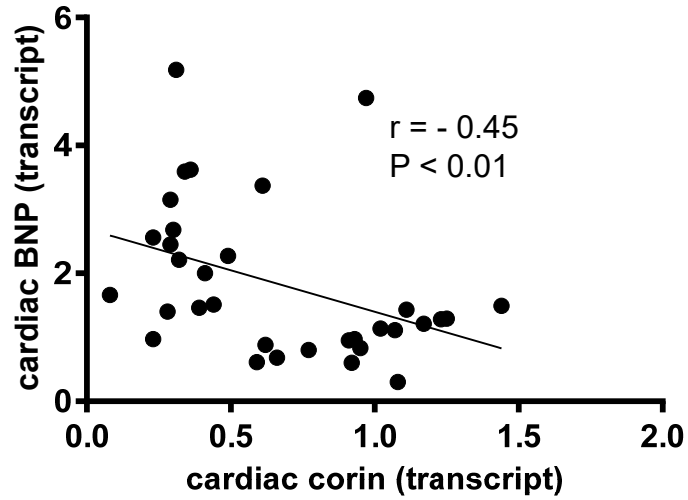

cardiac corin qPCR  
vs.  
cardiac anp qPCR

Pearson r  
r -0.4472  
95% confidence interval -0.6853 to -0.1227  
R squared 0.2  
  
P value  
P (two-tailed) 0.0091  
P value summary \*\*  
Significant? (alpha = 0.05) Yes  
  
Number of XY Pairs 33

| cardiac corin qPCR | cardiac anp qPCR |
|--------------------|------------------|
| 0.93               | 0.97             |
| 1.44               | 1.49             |
| 0.91               | 0.95             |
| 0.59               | 0.61             |
| 1.07               | 1.11             |
| 1.25               | 1.29             |
| 1.23               | 1.28             |
| 1.17               | 1.21             |
| 0.66               | 0.68             |
| 0.77               | 0.8              |
| 1.08               | 0.3              |
| 0.97               | 4.74             |
| 0.95               | 0.83             |
| 1.02               | 1.14             |
| 0.62               | 0.88             |
| 0.92               | 0.6              |
| 1.11               | 1.43             |
| 0.36               | 3.62             |
| 0.61               | 3.37             |
| 0.08               | 1.66             |
| 0.31               | 5.18             |
| 0.34               | 3.59             |
| 0.29               | 3.15             |
| 0.32               | 2.21             |
| 0.23               | 2.56             |
| 0.44               | 1.51             |
| 0.23               | 0.97             |
| 0.49               | 2.27             |
| 0.39               | 1.46             |
| 0.41               | 2                |
| 0.28               | 1.4              |
| 0.29               | 2.45             |
| 0.3                | 2.68             |

## Echocardiography Data

| Table 1. Echocardiography results of the study groups                                     |        |              |               |                |                |
|-------------------------------------------------------------------------------------------|--------|--------------|---------------|----------------|----------------|
| Parameter                                                                                 | Units  | non-MI ctl   | MI 3 h        | MI 24 h        | MI 72 h        |
| Mouse in groups                                                                           | number | 7            | 6             | 8              | 8              |
| Ejection Fraction                                                                         | %      | 63.89±1.38   | 32.49±3.85*** | 19.57±4.73***  | 23.85±5.17***  |
| Fractional Shortening                                                                     | %      | 34.61±0.93   | 15.45±1.97*** | 9.18±2.38***   | 11.38±2.63***  |
| Stroke Volume                                                                             | uL     | 58.92±6.54   | 30.91±1.82**  | 22.92±4.38***  | 28.67±5.19***  |
| Cardiac Output                                                                            | mL/min | 35.04±4.72   | 11.56±0.72*** | 9.44±2.20***   | 13.66±2.56***  |
| Diameter;s                                                                                | mm     | 2.92±0.17    | 3.95±0.29*    | 4.66±0.21***   | 4.58±0.21***   |
| Diameter;d                                                                                | mm     | 4.46±0.24    | 4.65±0.24     | 5.11±0.13      | 5.15±0.12*     |
| Volume;s                                                                                  | uL     | 33.91±4.18   | 70.86±11.85*  | 102.34±9.64*** | 98.56±10.29*** |
| Volume;d                                                                                  | uL     | 92.83±10.51  | 101.77±11.95  | 125.26±7.06*   | 127.23±6.68*   |
| LV Mass                                                                                   | mg     | 219.29±22.10 | 213.19±17.77  | 227.08±19.69   | 222.04±24.16   |
| LV Mass Cor                                                                               | mg     | 175.43±17.68 | 170.55        | 181.66±15.75   | 177.63±19.32   |
| LVAW;s                                                                                    | mm     | 1.44±0.08    | 1.37±0.19     | 1.23±0.15      | 1.00±0.14      |
| LVAW;d                                                                                    | mm     | 1.12±0.07    | 1.06±0.10     | 1.04±0.11      | 0.87±0.09      |
| LVPW;s                                                                                    | mm     | 1.50±0.06    | 1.14±0.18     | 0.98±0.13*     | 1.12±0.15      |
| LVPW;d                                                                                    | mm     | 1.07±0.07    | 1.02±0.18     | 0.89±0.11      | 1.00±0.12      |
| Values are presented as mean ± SE.                                                        |        |              |               |                |                |
| 1 way ANOVA-Bonferroni's multiple comparisons test was used for comparesion among groups. |        |              |               |                |                |



## non-MI control

| Parameter | Diameter;s | Diameter;d | Volume;s | Volume;d | Stroke Volume | Ejection Fraction | Fractional Shortening | Cardiac Output | LV Mass | LV Mass Cor | LVA W;s | LVA W;d | LVP W;s | LVP W;d |
|-----------|------------|------------|----------|----------|---------------|-------------------|-----------------------|----------------|---------|-------------|---------|---------|---------|---------|
| Units     | mm         | mm         | uL       | uL       | uL            | %                 | %                     | mL/min         | mg      | mg          | mm      | mm      | mm      | mm      |
| non-MI 1  | 3.0        | 4.5        | 33.6     | 94.1     | 60.5          | 64.3              | 34.9                  | 32.6           | 243.3   | 194.7       | 1.7     | 1.3     | 1.6     | 1.1     |
| non-MI 2  | 3.1        | 4.9        | 39.2     | 111.1    | 72.0          | 64.8              | 35.5                  | 44.2           | 272.9   | 218.3       | 1.5     | 1.4     | 1.4     | 1.0     |
| non-MI 3  | 3.3        | 5.2        | 44.4     | 127.7    | 83.3          | 65.2              | 36.0                  | 55.2           | 196.6   | 157.3       | 1.1     | 1.0     | 1.4     | 0.7     |
| non-MI 4  | 3.3        | 4.9        | 44.1     | 110.3    | 66.2          | 60.0              | 32.0                  | 39.6           | 283.5   | 226.8       | 1.7     | 1.3     | 1.4     | 1.1     |
| non-MI 5  | 2.7        | 4.1        | 27.0     | 75.2     | 48.2          | 64.1              | 34.5                  | 24.7           | 160.7   | 128.6       | 1.4     | 0.9     | 1.5     | 1.0     |
| non-MI 6  | 2.0        | 3.3        | 13.0     | 43.4     | 30.4          | 70.0              | 38.3                  | 17.8           | 129.2   | 103.4       | 1.5     | 1.0     | 1.5     | 1.2     |
| non-MI 7  | 3.0        | 4.4        | 36.1     | 87.9     | 51.8          | 58.9              | 31.0                  | 31.1           | 248.8   | 199.1       | 1.3     | 1.1     | 1.8     | 1.4     |
| average   | 2.9        | 4.5        | 33.9     | 92.8     | 58.9          | 63.9              | 34.6                  | 35.0           | 219.3   | 175.4       | 1.4     | 1.1     | 1.5     | 1.1     |
| STDEV     | 0.5        | 0.6        | 11.1     | 27.8     | 17.3          | 3.6               | 2.5                   | 12.5           | 58.5    | 46.8        | 0.2     | 0.2     | 0.2     | 0.2     |
| SE        | 0.2        | 0.2        | 4.2      | 10.5     | 6.5           | 1.4               | 0.9                   | 4.7            | 22.1    | 17.7        | 0.1     | 0.1     | 0.1     | 0.1     |

## MI 3 hrs

| MI 3 hrs  |            |            |          |          |               |                   |                       |                          |               |               |         |         |         |         |
|-----------|------------|------------|----------|----------|---------------|-------------------|-----------------------|--------------------------|---------------|---------------|---------|---------|---------|---------|
| Parameter | Diameter;s | Diameter;d | Volume;s | Volume;d | Stroke Volume | Ejection Fraction | Fractional Shortening | Cardiac Output<br>mL/min | LV Mass<br>mg | LV Mass<br>mg | LVA W;s | LVA W;d | LVP W;s | LVP W;d |
| Units     | mm         | mm         | uL       | uL       | uL            | %                 | %                     | n                        | mg            | mg            | mm      | mm      | mm      | mm      |
| MI 3h 1   | 3.1        | 3.8        | 36.6     | 60.9     | 24.4          | 40.0              | 19.1                  | 9.5                      | 272.8         | 218.3         | 1.5     | 1.1     | 2.0     | 1.9     |
| MI 3h 2   | 3.9        | 4.7        | 66.2     | 103.0    | 36.7          | 35.7              | 17.1                  | 14.3                     | 162.5         | 130.0         | 1.0     | 0.9     | 1.2     | 0.8     |
| MI 3h 3   | 3.2        | 4.1        | 41.5     | 75.1     | 33.5          | 44.7              | 21.9                  | 12.8                     | 198.3         | 158.6         | 2.1     | 1.4     | 0.9     | 0.9     |
| MI 3h 4   | 4.1        | 4.8        | 75.6     | 108.8    | 33.3          | 30.6              | 14.4                  | 10.9                     | 225.6         | 180.4         | 1.3     | 1.1     | 1.1     | 0.9     |
| MI 3h 5   | 4.9        | 5.3        | 110.2    | 138.2    | 28.0          | 20.3              | 9.3                   | 10.3                     | 171.5         | 137.2         | 0.8     | 0.7     | 0.8     | 0.8     |
| MI 3h 6   | 4.6        | 5.1        | 95.0     | 124.6    | 29.5          | 23.7              | 11.0                  | 11.4                     | 248.4         | 198.7         | 1.6     | 1.2     | 0.8     | 0.8     |
| average   | 4.0        | 4.6        | 70.9     | 101.8    | 30.9          | 32.5              | 15.5                  | 11.6                     | 213.2         | 170.6         | 1.4     | 1.1     | 1.1     | 1.0     |
| STDEV     | 0.7        | 0.6        | 29.0     | 29.3     | 4.5           | 9.4               | 4.8                   | 1.8                      | 43.5          | 34.8          | 0.5     | 0.3     | 0.4     | 0.4     |
| SE        | 0.3        | 0.2        | 11.9     | 11.9     | 1.8           | 3.9               | 2.0                   | 0.7                      | 17.8          | 14.2          | 0.2     | 0.1     | 0.2     | 0.2     |

## WT MI 24 h

| WT MI 24 h |            |            |          |          |               |                   |                       |                          |               |                      |               |               |               |               |
|------------|------------|------------|----------|----------|---------------|-------------------|-----------------------|--------------------------|---------------|----------------------|---------------|---------------|---------------|---------------|
| Parameter  | Diameter;s | Diameter;d | Volume;s | Volume;d | Stroke Volume | Ejection Fraction | Fractional Shortening | Cardiac Output<br>mL/min | LV Mass<br>mg | LV Mass<br>Cor<br>mg | LVA W;s<br>mm | LVA W;d<br>mm | LVP W;s<br>mm | LVP W;d<br>mm |
| Units      | mm         | mm         | uL       | uL       | uL            | %                 | %                     | n                        | mg            | mg                   | mm            | mm            | mm            | mm            |
| MI 24 h 1  | 4.9        | 5.1        | 114.5    | 125.4    | 10.9          | 8.7               | 3.9                   | 5.6                      | 238.5         | 190.8                | 1.4           | 1.3           | 0.7           | 0.7           |
| MI 24 h 2  | 4.8        | 5.1        | 105.8    | 125.2    | 19.4          | 15.5              | 7.0                   | 8.0                      | 206.2         | 165.0                | 1.2           | 1.1           | 0.8           | 0.7           |
| MI 24 h 3  | 5.2        | 5.4        | 129.3    | 140.5    | 11.1          | 7.9               | 3.5                   | 3.7                      | 199.3         | 159.4                | 0.8           | 0.8           | 0.9           | 0.9           |
| MI 24 h 4  | 4.2        | 4.8        | 79.6     | 109.0    | 29.4          | 26.9              | 12.5                  | 14.5                     | 223.4         | 178.7                | 1.5           | 1.2           | 0.9           | 0.8           |
| MI 24 h 5  | 3.4        | 4.4        | 46.9     | 86.8     | 39.9          | 45.9              | 22.8                  | 13.9                     | 351.2         | 280.9                | 1.8           | 1.5           | 1.8           | 1.6           |
| MI 24 h 6  | 5.1        | 5.5        | 125.4    | 149.8    | 24.4          | 16.3              | 7.4                   | 11.4                     | 174.6         | 139.6                | 0.6           | 0.6           | 0.9           | 0.8           |
| MI 24 h 7  | 5.0        | 5.1        | 116.4    | 125.6    | 9.2           | 7.3               | 3.2                   | 0.0                      | 182.3         | 145.8                | 0.9           | 0.8           | 0.9           | 0.8           |
| MI 24 h 8  | 4.7        | 5.4        | 100.9    | 139.9    | 39.0          | 27.9              | 13.2                  | 18.5                     | 241.2         | 192.9                | 1.6           | 1.0           | 0.9           | 0.9           |
| average    | 4.7        | 5.1        | 102.3    | 125.3    | 22.9          | 19.6              | 9.2                   | 9.4                      | 227.1         | 181.7                | 1.2           | 1.0           | 1.0           | 0.9           |
| STDEV      | 0.6        | 0.4        | 27.3     | 20.0     | 12.4          | 13.4              | 6.7                   | 6.2                      | 55.7          | 44.6                 | 0.4           | 0.3           | 0.4           | 0.3           |
| SE         | 0.2        | 0.1        | 9.6      | 7.1      | 4.4           | 4.7               | 2.4                   | 2.2                      | 19.7          | 15.8                 | 0.1           | 0.1           | 0.1           | 0.1           |

## WT MI 72 h

| WT MI 72 h |             |             |           |           |               |                   |                       |                       |            |                |            |            |            |            |
|------------|-------------|-------------|-----------|-----------|---------------|-------------------|-----------------------|-----------------------|------------|----------------|------------|------------|------------|------------|
| Parameter  | Diameter; s | Diameter; d | Volume; s | Volume; d | Stroke Volume | Ejection Fraction | Fractional Shortening | Cardiac Output mL/min | LV Mass mg | LV Mass Cor mg | LVA W;s mm | LVA W;d mm | LVP W;s mm | LVP W;d mm |
| Units      | mm          | mm          | uL        | uL        | uL            | %                 | %                     |                       | mg         | mg             | mm         | mm         | mm         | mm         |
| MI 72 h 1  | 5.3         | 5.7         | 137.2     | 157.7     | 20.5          | 13.0              | 5.9                   | 10.3                  | 222.6      | 178.1          | 0.8        | 0.7        | 1.0        | 0.9        |
| MI 72 h 2  | 4.9         | 5.0         | 114.6     | 119.6     | 5.0           | 4.2               | 1.8                   | 2.2                   | 121.0      | 96.8           | 0.5        | 0.5        | 0.7        | 0.7        |
| MI 72 h 3  | 4.9         | 5.4         | 113.8     | 139.3     | 25.4          | 18.3              | 8.3                   | 12.1                  | 149.9      | 119.9          | 0.7        | 0.7        | 0.7        | 0.6        |
| MI 72 h 4  | 4.6         | 5.3         | 97.4      | 133.3     | 35.9          | 26.9              | 12.6                  | 15.9                  | 251.2      | 201.0          | 1.6        | 1.2        | 0.9        | 0.8        |
| MI 72 h 5  | 4.1         | 4.8         | 75.5      | 106.9     | 31.4          | 29.3              | 13.7                  | 13.5                  | 318.9      | 255.1          | 1.0        | 1.1        | 1.7        | 1.6        |
| MI 72 h 6  | 3.7         | 4.8         | 58.8      | 108.3     | 49.5          | 45.7              | 22.8                  | 24.0                  | 231.6      | 185.3          | 1.5        | 1.1        | 1.2        | 1.0        |
| MI 72 h 7  | 5.1         | 5.4         | 125.7     | 143.0     | 17.3          | 12.1              | 5.4                   | 8.5                   | 184.6      | 147.7          | 0.7        | 0.6        | 0.9        | 0.9        |
| MI 72 h 8  | 3.9         | 4.8         | 65.3      | 109.7     | 44.4          | 41.3              | 20.5                  | 22.8                  | 296.5      | 237.2          | 1.1        | 1.0        | 1.8        | 1.5        |
| average    | 4.6         | 5.1         | 98.6      | 127.2     | 28.7          | 23.9              | 11.4                  | 13.7                  | 222.0      | 177.6          | 1.0        | 0.9        | 1.1        | 1.0        |
| STDEV      | 0.6         | 0.3         | 29.1      | 18.9      | 14.7          | 14.6              | 7.4                   | 7.2                   | 68.3       | 54.7           | 0.4        | 0.3        | 0.4        | 0.4        |
| SE         | 0.2         | 0.1         | 10.3      | 6.7       | 5.2           | 5.2               | 2.6                   | 2.6                   | 24.2       | 19.3           | 0.1        | 0.1        | 0.2        | 0.1        |

## One way ANOVA: Ejection Fraction

|                                         |            |                    |              |             |                  |     |                   |    |
|-----------------------------------------|------------|--------------------|--------------|-------------|------------------|-----|-------------------|----|
| Number of families                      | 1          |                    |              |             |                  |     |                   |    |
| Number of comparisons per family        | 3          |                    |              |             |                  |     |                   |    |
| Alpha                                   | 0.05       |                    |              |             |                  |     |                   |    |
|                                         |            |                    |              |             |                  |     |                   |    |
| Bonferroni's multiple comparisons test  | Mean Diff. | 95.00% CI of diff. | Significant? | Summary     | Adjusted P Value | F-? |                   |    |
|                                         |            |                    |              |             |                  |     |                   |    |
| Ejection Fraction vs. Ejection Fraction | 31.4       | 15.08 to 47.72     | Yes          | ***         | 0.0001           | T   | Ejection Fraction |    |
| Ejection Fraction vs. Ejection Fraction | 44.35      | 29.17 to 59.53     | Yes          | ****        | <0.0001          | AH  | Ejection Fraction |    |
| Ejection Fraction vs. Ejection Fraction | 40.05      | 24.87 to 55.23     | Yes          | ****        | <0.0001          | AV  | Ejection Fraction |    |
|                                         |            |                    |              |             |                  |     |                   |    |
|                                         |            |                    |              |             |                  |     |                   |    |
| Test details                            | Mean 1     | Mean 2             | Mean Diff.   | SE of diff. | n1               | n2  | t                 | DF |
|                                         |            |                    |              |             |                  |     |                   |    |
| Ejection Fraction vs. Ejection Fraction | 63.9       | 32.5               | 31.4         | 6.36        | 7                | 6   | 4.937             | 25 |
| Ejection Fraction vs. Ejection Fraction | 63.9       | 19.55              | 44.35        | 5.917       | 7                | 8   | 7.496             | 25 |
| Ejection Fraction vs. Ejection Fraction | 63.9       | 23.85              | 40.05        | 5.917       | 7                | 8   | 6.769             | 25 |

## One way ANOVA: Fractional Shortening

|                                                 |            |                    |              |             |                  |     |                       |    |
|-------------------------------------------------|------------|--------------------|--------------|-------------|------------------|-----|-----------------------|----|
| Number of families                              | 1          |                    |              |             |                  |     |                       |    |
| Number of comparisons per family                | 3          |                    |              |             |                  |     |                       |    |
| Alpha                                           | 0.05       |                    |              |             |                  |     |                       |    |
|                                                 |            |                    |              |             |                  |     |                       |    |
| Bonferroni's multiple comparisons test          | Mean Diff. | 95.00% CI of diff. | Significant? | Summary     | Adjusted P Value | G-? |                       |    |
|                                                 |            |                    |              |             |                  |     |                       |    |
| Fractional Shortening vs. Fractional Shortening | 19.13      | 10.78 to 27.49     | Yes          | ****        | <0.0001          | U   | Fractional Shortening |    |
| Fractional Shortening vs. Fractional Shortening | 25.41      | 17.64 to 33.19     | Yes          | ****        | <0.0001          | AI  | Fractional Shortening |    |
| Fractional Shortening vs. Fractional Shortening | 23.23      | 15.45 to 31        | Yes          | ****        | <0.0001          | AW  | Fractional Shortening |    |
|                                                 |            |                    |              |             |                  |     |                       |    |
|                                                 |            |                    |              |             |                  |     |                       |    |
| Test details                                    | Mean 1     | Mean 2             | Mean Diff.   | SE of diff. | n1               | n2  | t                     | DF |
|                                                 |            |                    |              |             |                  |     |                       |    |
| Fractional Shortening vs. Fractional Shortening | 34.6       | 15.47              | 19.13        | 3.257       | 7                | 6   | 5.875                 | 25 |
| Fractional Shortening vs. Fractional Shortening | 34.6       | 9.188              | 25.41        | 3.03        | 7                | 8   | 8.388                 | 25 |
| Fractional Shortening vs. Fractional Shortening | 34.6       | 11.38              | 23.23        | 3.03        | 7                | 8   | 7.666                 | 25 |

## One way ANOVA:Stroke Volume

|                                        |            |                    |              |             |                  |     |               |    |
|----------------------------------------|------------|--------------------|--------------|-------------|------------------|-----|---------------|----|
| Number of families                     | 1          |                    |              |             |                  |     |               |    |
| Number of comparisons per family       | 3          |                    |              |             |                  |     |               |    |
| Alpha                                  | 0.05       |                    |              |             |                  |     |               |    |
|                                        |            |                    |              |             |                  |     |               |    |
| Bonferroni's multiple comparisons test | Mean Diff. | 95.00% CI of diff. | Significant? | Summary     | Adjusted P Value | E-? |               |    |
|                                        |            |                    |              |             |                  |     |               |    |
| Stroke Volume vs. Stroke Volume        | 28.01      | 8.898 to 47.13     | Yes          | **          | 0.0027           | S   | Stroke Volume |    |
| Stroke Volume vs. Stroke Volume        | 36         | 18.22 to 53.78     | Yes          | ****        | <0.0001          | AG  | Stroke Volume |    |
| Stroke Volume vs. Stroke Volume        | 30.24      | 12.46 to 48.02     | Yes          | ***         | 0.0006           | AU  | Stroke Volume |    |
|                                        |            |                    |              |             |                  |     |               |    |
|                                        |            |                    |              |             |                  |     |               |    |
| Test details                           | Mean 1     | Mean 2             | Mean Diff.   | SE of diff. | n1               | n2  | t             | DF |
|                                        |            |                    |              |             |                  |     |               |    |
| Stroke Volume vs. Stroke Volume        | 58.91      | 30.9               | 28.01        | 7.45        | 7                | 6   | 3.76          | 25 |
| Stroke Volume vs. Stroke Volume        | 58.91      | 22.91              | 36           | 6.93        | 7                | 8   | 5.195         | 25 |
| Stroke Volume vs. Stroke Volume        | 58.91      | 28.68              | 30.24        | 6.93        | 7                | 8   | 4.363         | 25 |

## One way ANOVA: Cardiac Output

|                                        |            |                    |              |             |                  |     |                |    |
|----------------------------------------|------------|--------------------|--------------|-------------|------------------|-----|----------------|----|
| Number of families                     | 1          |                    |              |             |                  |     |                |    |
| Number of comparisons per family       | 3          |                    |              |             |                  |     |                |    |
| Alpha                                  | 0.05       |                    |              |             |                  |     |                |    |
|                                        |            |                    |              |             |                  |     |                |    |
| Bonferroni's multiple comparisons test | Mean Diff. | 95.00% CI of diff. | Significant? | Summary     | Adjusted P Value | H-? |                |    |
|                                        |            |                    |              |             |                  |     |                |    |
| Cardiac Output vs. Cardiac Output      | 23.5       | 12.11 to 34.88     | Yes          | ****        | <0.0001          | V   | Cardiac Output |    |
| Cardiac Output vs. Cardiac Output      | 25.58      | 14.99 to 36.17     | Yes          | ****        | <0.0001          | AJ  | Cardiac Output |    |
| Cardiac Output vs. Cardiac Output      | 21.37      | 10.78 to 31.96     | Yes          | ****        | <0.0001          | AX  | Cardiac Output |    |
|                                        |            |                    |              |             |                  |     |                |    |
|                                        |            |                    |              |             |                  |     |                |    |
| Test details                           | Mean 1     | Mean 2             | Mean Diff.   | SE of diff. | n1               | n2  | t              | DF |
|                                        |            |                    |              |             |                  |     |                |    |
| Cardiac Output vs. Cardiac Output      | 35.03      | 11.53              | 23.5         | 4.436       | 7                | 6   | 5.296          | 25 |
| Cardiac Output vs. Cardiac Output      | 35.03      | 9.45               | 25.58        | 4.127       | 7                | 8   | 6.198          | 25 |
| Cardiac Output vs. Cardiac Output      | 35.03      | 13.66              | 21.37        | 4.127       | 7                | 8   | 5.177          | 25 |



## One way ANOVA: Diameter;s

|                                        |            |                    |              |             |                  |     |            |    |
|----------------------------------------|------------|--------------------|--------------|-------------|------------------|-----|------------|----|
| Number of families                     | 1          |                    |              |             |                  |     |            |    |
| Number of comparisons per family       | 3          |                    |              |             |                  |     |            |    |
| Alpha                                  | 0.05       |                    |              |             |                  |     |            |    |
| Bonferroni's multiple comparisons test | Mean Diff. | 95.00% CI of diff. | Significant? | Summary     | Adjusted P Value | A-? |            |    |
| Diameter;s vs. Diameter;s              | -1.052     | -1.899 to -0.2054  | Yes          | *           | 0.0115           | O   | Diameter;s |    |
| Diameter;s vs. Diameter;s              | -1.748     | -2.536 to -0.9603  | Yes          | ****        | <0.0001          | AC  | Diameter;s |    |
| Diameter;s vs. Diameter;s              | -1.648     | -2.436 to -0.8603  | Yes          | ****        | <0.0001          | AQ  | Diameter;s |    |
| Test details                           | Mean 1     | Mean 2             | Mean Diff.   | SE of diff. | n1               | n2  | t          | DF |
| Diameter;s vs. Diameter;s              | 2.914      | 3.967              | -1.052       | 0.3301      | 7                | 6   | 3.188      | 25 |
| Diameter;s vs. Diameter;s              | 2.914      | 4.663              | -1.748       | 0.307       | 7                | 8   | 5.694      | 25 |
| Diameter;s vs. Diameter;s              | 2.914      | 4.563              | -1.648       | 0.307       | 7                | 8   | 5.368      | 25 |

## One way ANOVA: Diameter;d

|                                        |            |                    |              |             |                  |     |            |    |
|----------------------------------------|------------|--------------------|--------------|-------------|------------------|-----|------------|----|
| Number of families                     | 1          |                    |              |             |                  |     |            |    |
| Number of comparisons per family       | 3          |                    |              |             |                  |     |            |    |
| Alpha                                  | 0.05       |                    |              |             |                  |     |            |    |
| Bonferroni's multiple comparisons test | Mean Diff. | 95.00% CI of diff. | Significant? | Summary     | Adjusted P Value | B-? |            |    |
| Diameter;d vs. Diameter;d              | -0.1619    | -0.8523 to 0.5285  | No           | ns          | >0.9999          | P   | Diameter;d |    |
| Diameter;d vs. Diameter;d              | -0.6286    | -1.271 to 0.01371  | No           | ns          | 0.0566           | AD  | Diameter;d |    |
| Diameter;d vs. Diameter;d              | -0.6786    | -1.321 to -0.03629 | Yes          | *           | 0.0359           | AR  | Diameter;d |    |
| Test details                           | Mean 1     | Mean 2             | Mean Diff.   | SE of diff. | n1               | n2  | t          | DF |
| Diameter;d vs. Diameter;d              | 4.471      | 4.633              | -0.1619      | 0.2691      | 7                | 6   | 0.6017     | 25 |
| Diameter;d vs. Diameter;d              | 4.471      | 5.1                | -0.6286      | 0.2503      | 7                | 8   | 2.511      | 25 |
| Diameter;d vs. Diameter;d              | 4.471      | 5.15               | -0.6786      | 0.2503      | 7                | 8   | 2.711      | 25 |

## One way ANOVA:Volume;s

|                                        |            |                    |              |             |                  |     |          |    |
|----------------------------------------|------------|--------------------|--------------|-------------|------------------|-----|----------|----|
| Number of families                     | 1          |                    |              |             |                  |     |          |    |
| Number of comparisons per family       | 3          |                    |              |             |                  |     |          |    |
| Alpha                                  | 0.05       |                    |              |             |                  |     |          |    |
| Bonferroni's multiple comparisons test | Mean Diff. | 95.00% CI of diff. | Significant? | Summary     | Adjusted P Value | C-? |          |    |
| Volume;s vs. Volume;s                  | -36.94     | -73.15 to -0.7187  | Yes          | *           | 0.0445           | Q   | Volume;s |    |
| Volume;s vs. Volume;s                  | -68.44     | -102.1 to -34.74   | Yes          | ****        | <0.0001          | AE  | Volume;s |    |
| Volume;s vs. Volume;s                  | -64.62     | -98.31 to -30.93   | Yes          | ***         | 0.0001           | AS  | Volume;s |    |
|                                        |            |                    |              |             |                  |     |          |    |
| Test details                           | Mean 1     | Mean 2             | Mean Diff.   | SE of diff. | n1               | n2  | t        | DF |
| Volume;s vs. Volume;s                  | 33.91      | 70.85              | -36.94       | 14.11       | 7                | 6   | 2.617    | 25 |
| Volume;s vs. Volume;s                  | 33.91      | 102.4              | -68.44       | 13.13       | 7                | 8   | 5.212    | 25 |
| Volume;s vs. Volume;s                  | 33.91      | 98.54              | -64.62       | 13.13       | 7                | 8   | 4.922    | 25 |

# One way ANOVA:Volume;d

|                                        |            |                    |              |             |                  |     |          |    |
|----------------------------------------|------------|--------------------|--------------|-------------|------------------|-----|----------|----|
| Number of families                     | 1          |                    |              |             |                  |     |          |    |
| Number of comparisons per family       | 3          |                    |              |             |                  |     |          |    |
| Alpha                                  | 0.05       |                    |              |             |                  |     |          |    |
| Bonferroni's multiple comparisons test | Mean Diff. | 95.00% CI of diff. | Significant? | Summary     | Adjusted P Value | D-? |          |    |
| Volume;d vs. Volume;d                  | -8.952     | -42.98 to 25.08    | No           | ns          | >0.9999          | R   | Volume;d |    |
| Volume;d vs. Volume;d                  | -32.46     | -64.12 to -0.8045  | Yes          | *           | 0.0431           | AF  | Volume;d |    |
| Volume;d vs. Volume;d                  | -34.41     | -66.07 to -2.755   | Yes          | *           | 0.0299           | AT  | Volume;d |    |
| Test details                           | Mean 1     | Mean 2             | Mean Diff.   | SE of diff. | n1               | n2  | t        | DF |
| Volume;d vs. Volume;d                  | 92.81      | 101.8              | -8.952       | 13.26       | 7                | 6   | 0.6751   | 25 |
| Volume;d vs. Volume;d                  | 92.81      | 125.3              | -32.46       | 12.34       | 7                | 8   | 2.631    | 25 |
| Volume;d vs. Volume;d                  | 92.81      | 127.2              | -34.41       | 12.34       | 7                | 8   | 2.789    | 25 |

## One way ANOVA: LV Mass

|                                        |            |                    |              |             |                  |     |         |    |
|----------------------------------------|------------|--------------------|--------------|-------------|------------------|-----|---------|----|
| Number of families                     | 1          |                    |              |             |                  |     |         |    |
| Number of comparisons per family       | 3          |                    |              |             |                  |     |         |    |
| Alpha                                  | 0.05       |                    |              |             |                  |     |         |    |
| Bonferroni's multiple comparisons test | Mean Diff. | 95.00% CI of diff. | Significant? | Summary     | Adjusted P Value | I-? |         |    |
| LV Mass vs. LV Mass                    | 6.102      | -76.84 to 89.04    | No           | ns          | >0.9999          | W   | LV Mass |    |
| LV Mass vs. LV Mass                    | -7.802     | -84.96 to 69.35    | No           | ns          | >0.9999          | AK  | LV Mass |    |
| LV Mass vs. LV Mass                    | -2.752     | -79.91 to 74.4     | No           | ns          | >0.9999          | AY  | LV Mass |    |
| Test details                           | Mean 1     | Mean 2             | Mean Diff.   | SE of diff. | n1               | n2  | t       | DF |
| LV Mass vs. LV Mass                    | 219.3      | 213.2              | 6.102        | 32.32       | 7                | 6   | 0.1888  | 25 |
| LV Mass vs. LV Mass                    | 219.3      | 227.1              | -7.802       | 30.07       | 7                | 8   | 0.2595  | 25 |
| LV Mass vs. LV Mass                    | 219.3      | 222                | -2.752       | 30.07       | 7                | 8   | 0.09152 | 25 |

## One way ANOVA: LV Mass Cor

|                                        |            |                    |              |             |                  |     |             |    |
|----------------------------------------|------------|--------------------|--------------|-------------|------------------|-----|-------------|----|
| Number of families                     | 1          |                    |              |             |                  |     |             |    |
| Number of comparisons per family       | 3          |                    |              |             |                  |     |             |    |
| Alpha                                  | 0.05       |                    |              |             |                  |     |             |    |
|                                        |            |                    |              |             |                  |     |             |    |
| Bonferroni's multiple comparisons test | Mean Diff. | 95.00% CI of diff. | Significant? | Summary     | Adjusted P Value | J-? |             |    |
|                                        |            |                    |              |             |                  |     |             |    |
| LV Mass Cor vs. LV Mass Cor            | 4.924      | -61.42 to 71.27    | No           | ns          | >0.9999          | X   | LV Mass Cor |    |
| LV Mass Cor vs. LV Mass Cor            | -6.18      | -67.9 to 55.54     | No           | ns          | >0.9999          | AL  | LV Mass Cor |    |
| LV Mass Cor vs. LV Mass Cor            | -2.18      | -63.9 to 59.54     | No           | ns          | >0.9999          | AZ  | LV Mass Cor |    |
|                                        |            |                    |              |             |                  |     |             |    |
|                                        |            |                    |              |             |                  |     |             |    |
| Test details                           | Mean 1     | Mean 2             | Mean Diff.   | SE of diff. | n1               | n2  | t           | DF |
|                                        |            |                    |              |             |                  |     |             |    |
| LV Mass Cor vs. LV Mass Cor            | 175.5      | 170.5              | 4.924        | 25.86       | 7                | 6   | 0.1904      | 25 |
| LV Mass Cor vs. LV Mass Cor            | 175.5      | 181.6              | -6.18        | 24.05       | 7                | 8   | 0.2569      | 25 |
| LV Mass Cor vs. LV Mass Cor            | 175.5      | 177.6              | -2.18        | 24.05       | 7                | 8   | 0.09065     | 25 |

## One way ANOVA:LVAW;s

|                                        |            |                    |              |             |                  |     |        |    |
|----------------------------------------|------------|--------------------|--------------|-------------|------------------|-----|--------|----|
| Number of families                     | 1          |                    |              |             |                  |     |        |    |
| Number of comparisons per family       | 3          |                    |              |             |                  |     |        |    |
| Alpha                                  | 0.05       |                    |              |             |                  |     |        |    |
| Bonferroni's multiple comparisons test | Mean Diff. | 95.00% CI of diff. | Significant? | Summary     | Adjusted P Value | K-? |        |    |
| LVAW;s vs. LVAW;s                      | 0.07381    | -0.4746 to 0.6222  | No           | ns          | >0.9999          | Y   | LVAW;s |    |
| LVAW;s vs. LVAW;s                      | 0.2321     | -0.278 to 0.7423   | No           | ns          | 0.7619           | AM  | LVAW;s |    |
| LVAW;s vs. LVAW;s                      | 0.4696     | -0.04051 to 0.9798 | No           | ns          | 0.0788           | BA  | LVAW;s |    |
| Test details                           | Mean 1     | Mean 2             | Mean Diff.   | SE of diff. | n1               | n2  | t      | DF |
| LVAW;s vs. LVAW;s                      | 1.457      | 1.383              | 0.07381      | 0.2137      | 7                | 6   | 0.3454 | 25 |
| LVAW;s vs. LVAW;s                      | 1.457      | 1.225              | 0.2321       | 0.1988      | 7                | 8   | 1.168  | 25 |
| LVAW;s vs. LVAW;s                      | 1.457      | 0.9875             | 0.4696       | 0.1988      | 7                | 8   | 2.362  | 25 |

## One way ANOVA: LVAW;d

|                                   |            |                    |              |             |                  |     |        |    |
|-----------------------------------|------------|--------------------|--------------|-------------|------------------|-----|--------|----|
| Number of families                | 1          |                    |              |             |                  |     |        |    |
| Number of comparisons per family  | 3          |                    |              |             |                  |     |        |    |
| Alpha                             | 0.05       |                    |              |             |                  |     |        |    |
|                                   |            |                    |              |             |                  |     |        |    |
| Sidak's multiple comparisons test | Mean Diff. | 95.00% CI of diff. | Significant? | Summary     | Adjusted P Value | L-? |        |    |
|                                   |            |                    |              |             |                  |     |        |    |
| LVAW;d vs. LVAW;d                 | 0.07619    | -0.287 to 0.4394   | No           | ns          | 0.9342           | Z   | LVAW;d |    |
| LVAW;d vs. LVAW;d                 | 0.1054     | -0.2325 to 0.4433  | No           | ns          | 0.8173           | AN  | LVAW;d |    |
| LVAW;d vs. LVAW;d                 | 0.2804     | -0.05754 to 0.6183 | No           | ns          | 0.1259           | BB  | LVAW;d |    |
|                                   |            |                    |              |             |                  |     |        |    |
|                                   |            |                    |              |             |                  |     |        |    |
| Test details                      | Mean 1     | Mean 2             | Mean Diff.   | SE of diff. | n1               | n2  | t      | DF |
|                                   |            |                    |              |             |                  |     |        |    |
| LVAW;d vs. LVAW;d                 | 1.143      | 1.067              | 0.07619      | 0.142       | 7                | 6   | 0.5367 | 25 |
| LVAW;d vs. LVAW;d                 | 1.143      | 1.038              | 0.1054       | 0.1321      | 7                | 8   | 0.7977 | 25 |
| LVAW;d vs. LVAW;d                 | 1.143      | 0.8625             | 0.2804       | 0.1321      | 7                | 8   | 2.123  | 25 |



## One way ANOVA: LVPW;s

|                                        |            |                    |              |             |                  |     |        |    |
|----------------------------------------|------------|--------------------|--------------|-------------|------------------|-----|--------|----|
| Number of families                     | 1          |                    |              |             |                  |     |        |    |
| Number of comparisons per family       | 3          |                    |              |             |                  |     |        |    |
| Alpha                                  | 0.05       |                    |              |             |                  |     |        |    |
| Bonferroni's multiple comparisons test | Mean Diff. | 95.00% CI of diff. | Significant? | Summary     | Adjusted P Value | M-? |        |    |
| LVPW;s vs. LVPW;s                      | 0.381      | -0.1334 to 0.8953  | No           | ns          | 0.2069           | AA  | LVPW;s |    |
| LVPW;s vs. LVPW;s                      | 0.5393     | 0.06078 to 1.018   | Yes          | *           | 0.0234           | AO  | LVPW;s |    |
| LVPW;s vs. LVPW;s                      | 0.4018     | -0.07672 to 0.8803 | No           | ns          | 0.1231           | BC  | LVPW;s |    |
| Test details                           | Mean 1     | Mean 2             | Mean Diff.   | SE of diff. | n1               | n2  | t      | DF |
| LVPW;s vs. LVPW;s                      | 1.514      | 1.133              | 0.381        | 0.2005      | 7                | 6   | 1.9    | 25 |
| LVPW;s vs. LVPW;s                      | 1.514      | 0.975              | 0.5393       | 0.1865      | 7                | 8   | 2.892  | 25 |
| LVPW;s vs. LVPW;s                      | 1.514      | 1.113              | 0.4018       | 0.1865      | 7                | 8   | 2.155  | 25 |

## One way ANOVA: LVPW;d

|                                        |            |                    |              |             |                  |     |        |    |
|----------------------------------------|------------|--------------------|--------------|-------------|------------------|-----|--------|----|
| Number of families                     | 1          |                    |              |             |                  |     |        |    |
| Number of comparisons per family       | 3          |                    |              |             |                  |     |        |    |
| Alpha                                  | 0.05       |                    |              |             |                  |     |        |    |
| Bonferroni's multiple comparisons test | Mean Diff. | 95.00% CI of diff. | Significant? | Summary     | Adjusted P Value | N-? |        |    |
| LVPW;d vs. LVPW;d                      | 0.05476    | -0.4181 to 0.5276  | No           | ns          | >0.9999          | AB  | LVPW;d |    |
| LVPW;d vs. LVPW;d                      | 0.1714     | -0.2684 to 0.6113  | No           | ns          | 0.9806           | AP  | LVPW;d |    |
| LVPW;d vs. LVPW;d                      | 0.07143    | -0.3684 to 0.5113  | No           | ns          | >0.9999          | BD  | LVPW;d |    |
| Test details                           | Mean 1     | Mean 2             | Mean Diff.   | SE of diff. | n1               | n2  | t      | DF |
| LVPW;d vs. LVPW;d                      | 1.071      | 1.017              | 0.05476      | 0.1843      | 7                | 6   | 0.2972 | 25 |
| LVPW;d vs. LVPW;d                      | 1.071      | 0.9                | 0.1714       | 0.1714      | 7                | 8   | 1      | 25 |
| LVPW;d vs. LVPW;d                      | 1.071      | 1                  | 0.07143      | 0.1714      | 7                | 8   | 0.4167 | 25 |
